# Supplementary material
Source: MDPI journal article supplement (https://www.mdpi.com/2072-4292/13/7/1309)

Appendix C: Terminus Change Time Series

Glacier time series graphs with alphanumeric identifiers. Terminus position change along the glacier centreline has been normalized by glacier length.

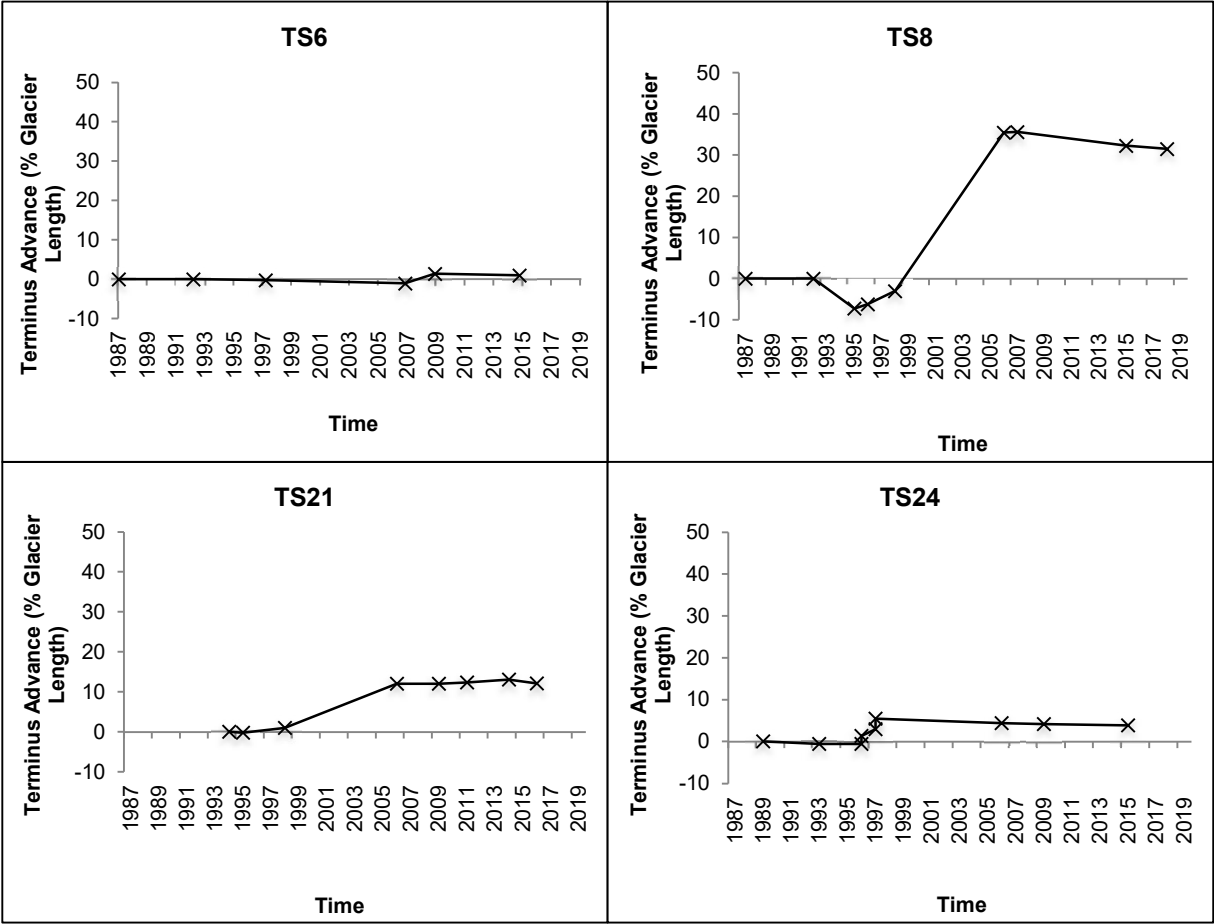

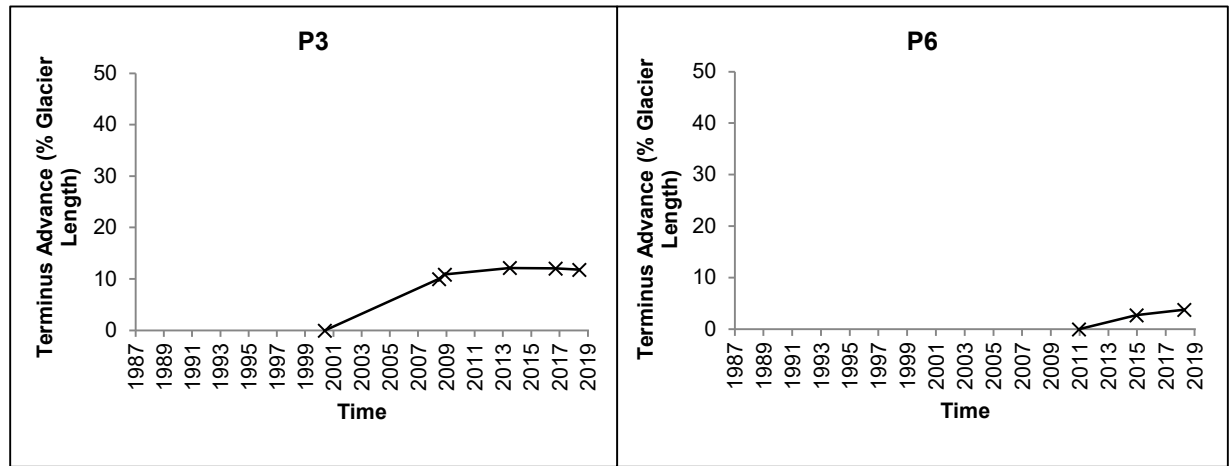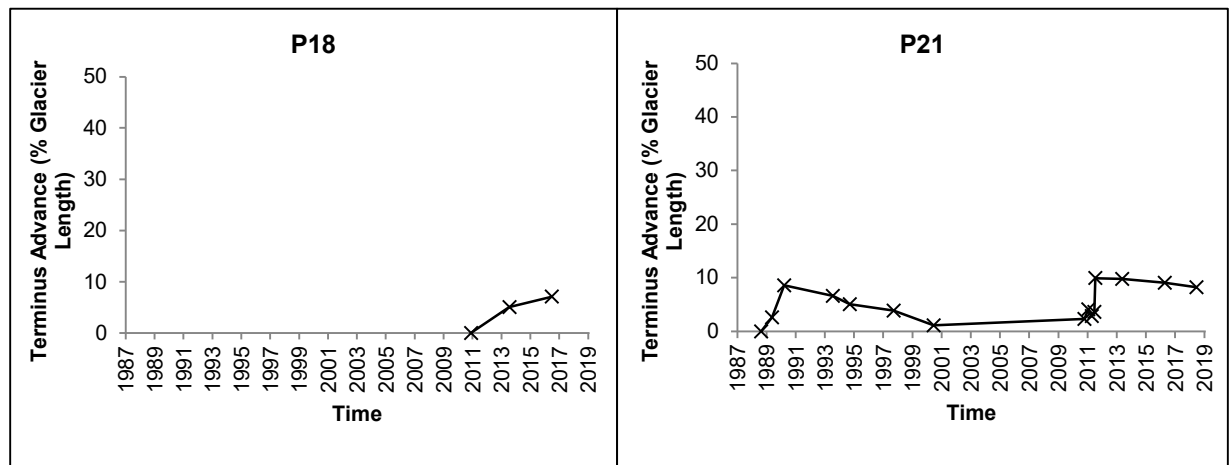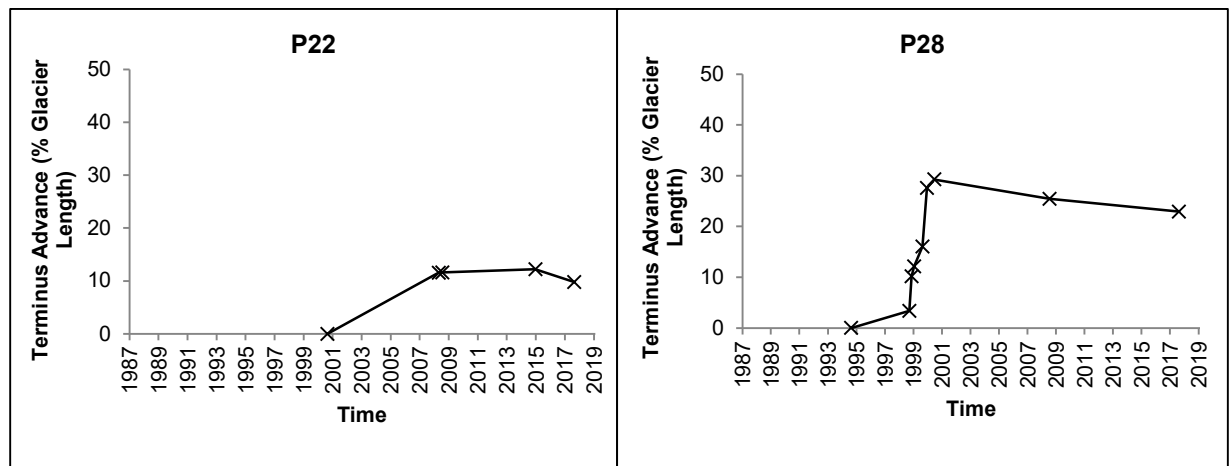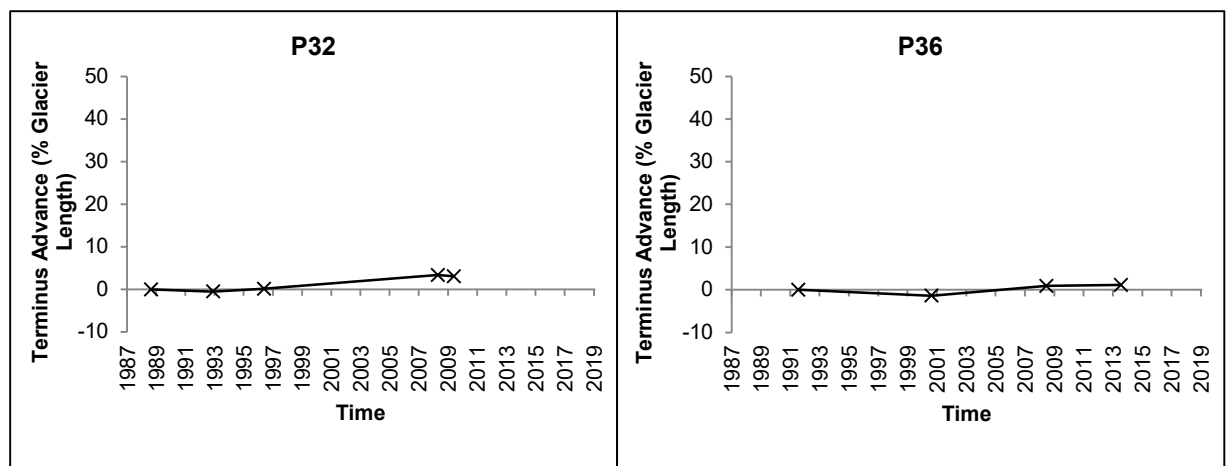

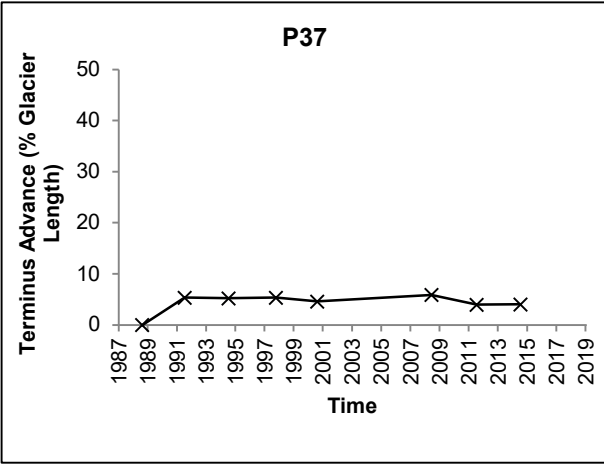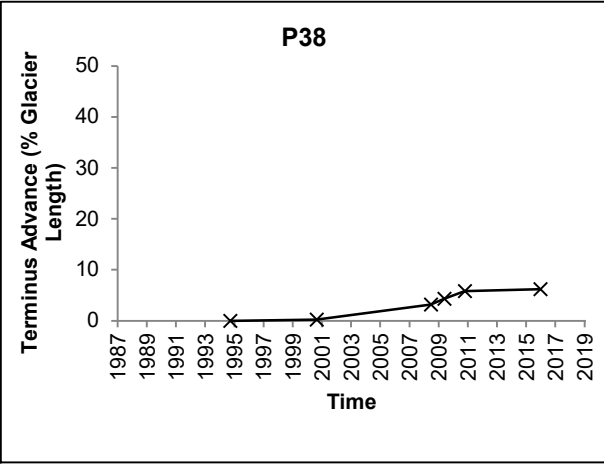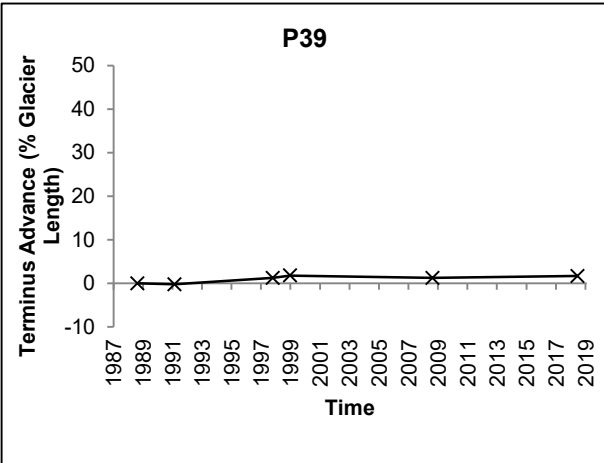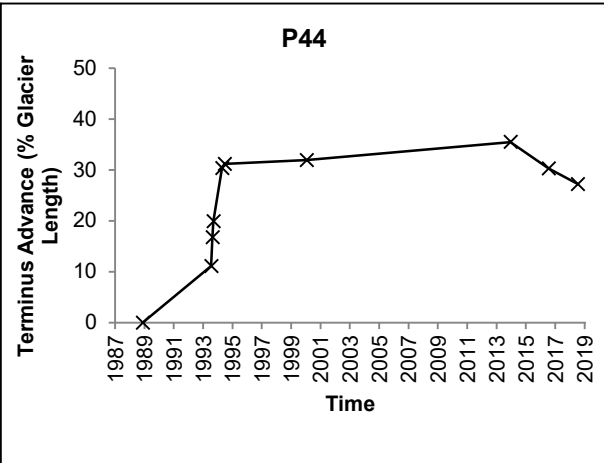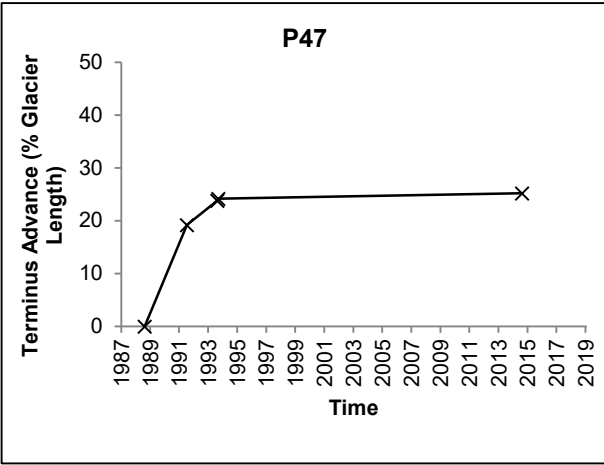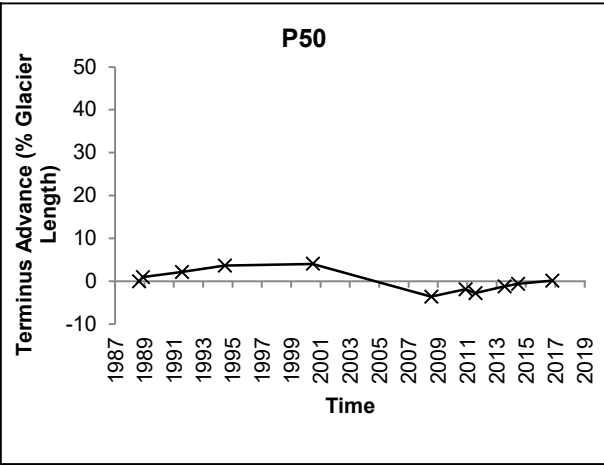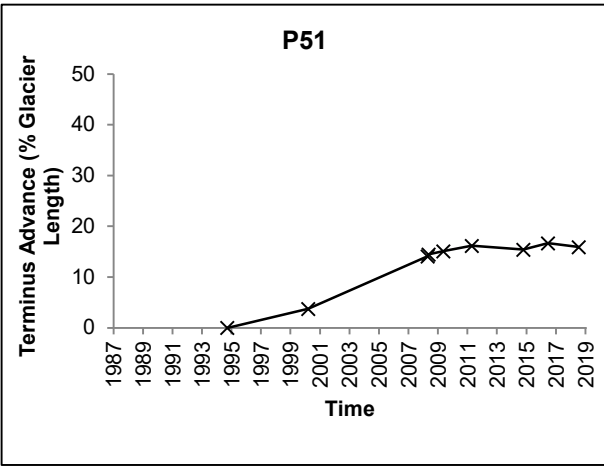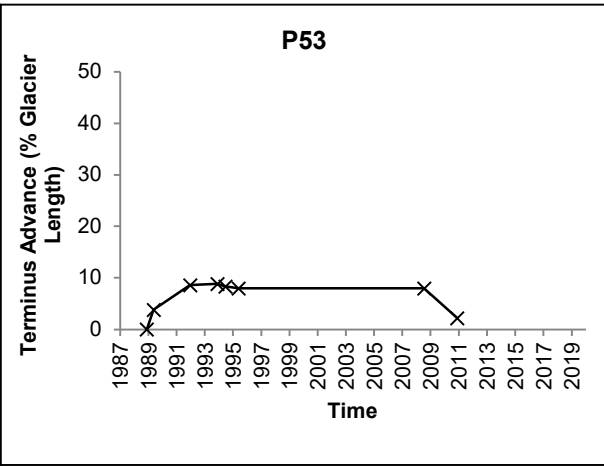

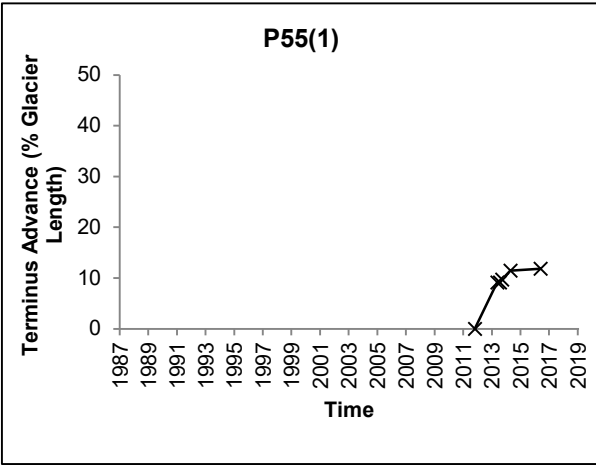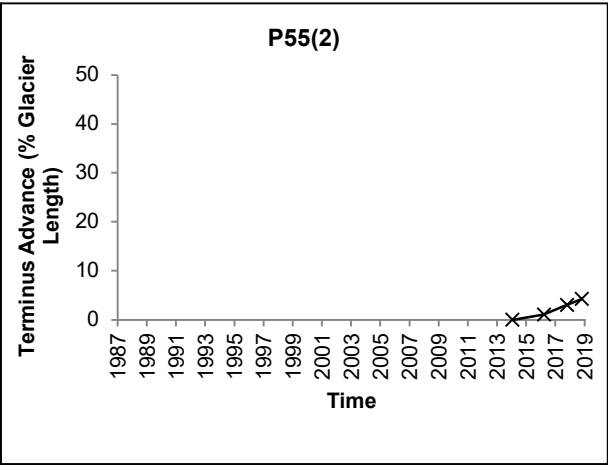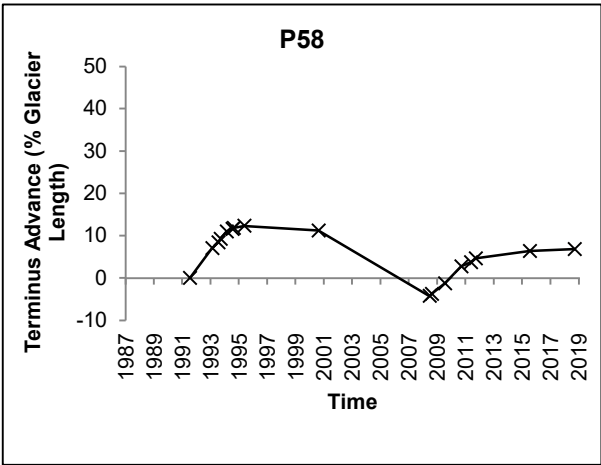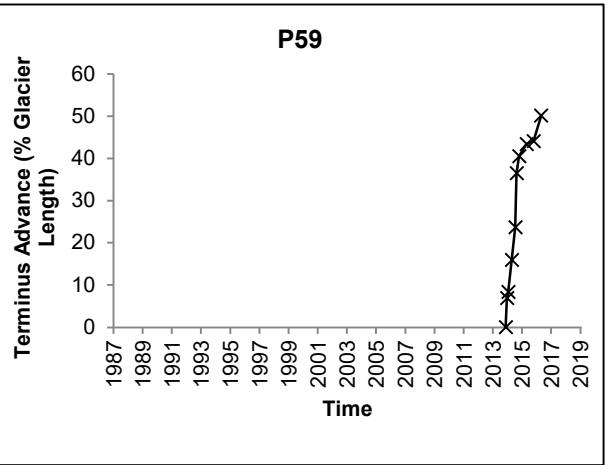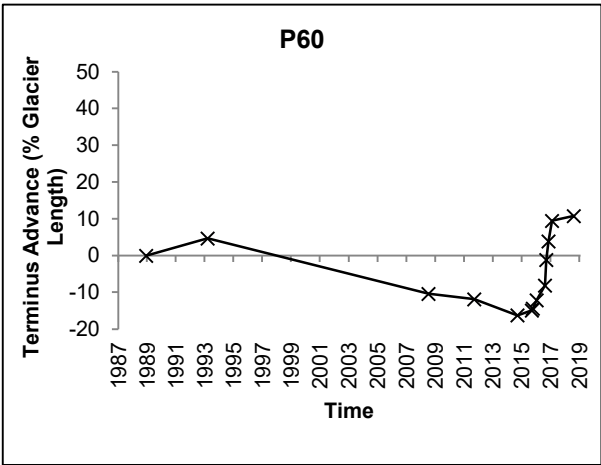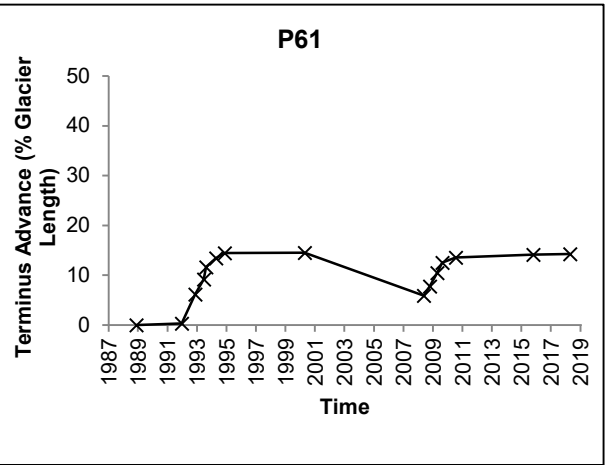

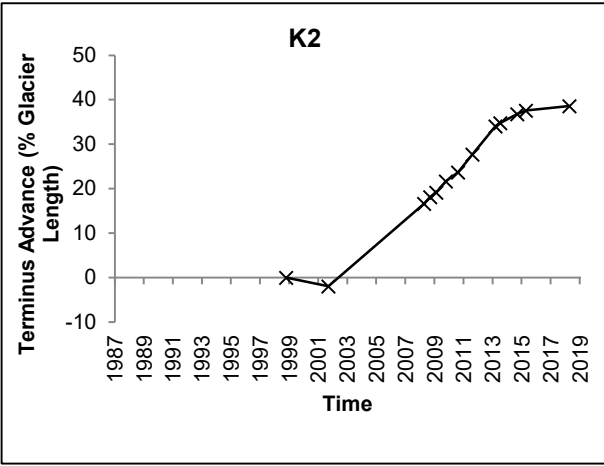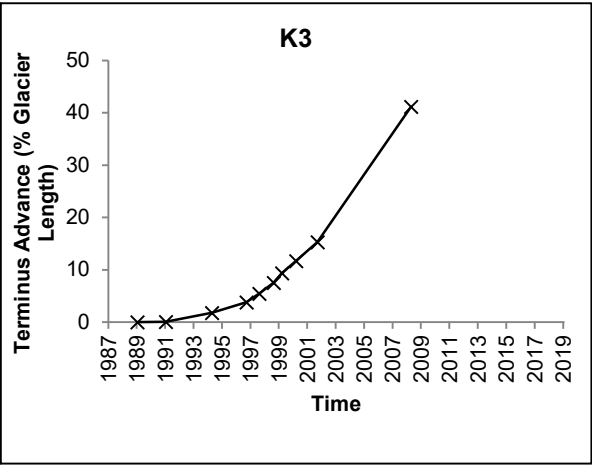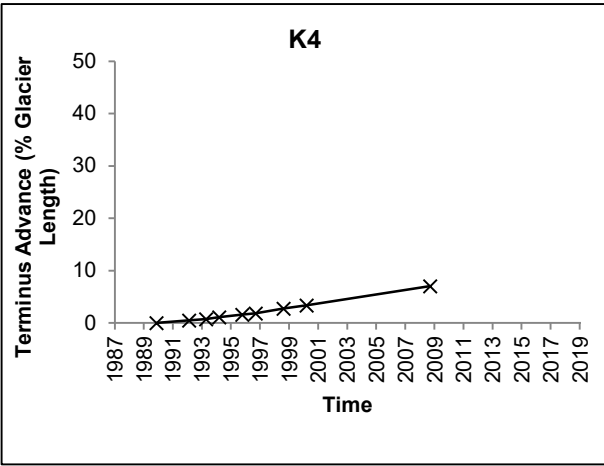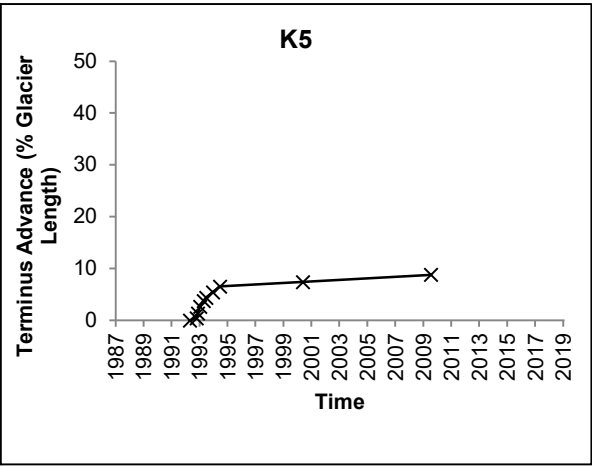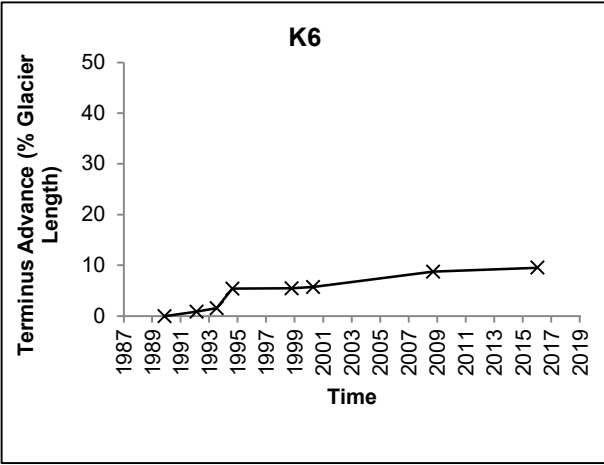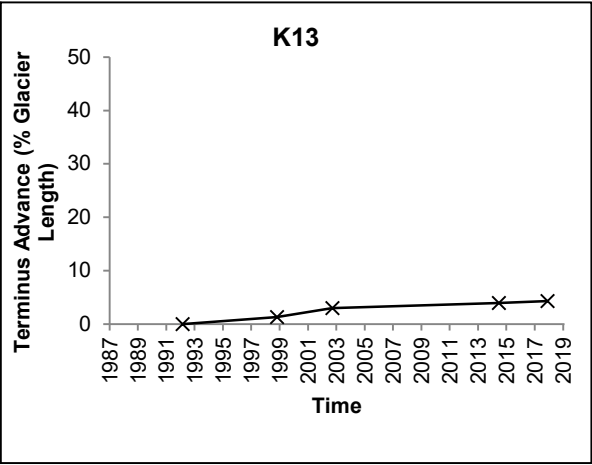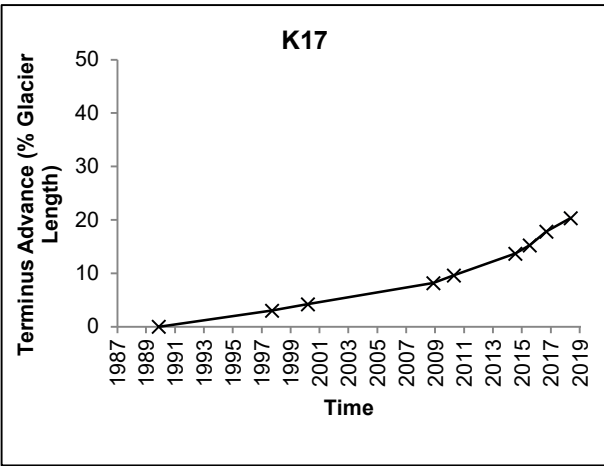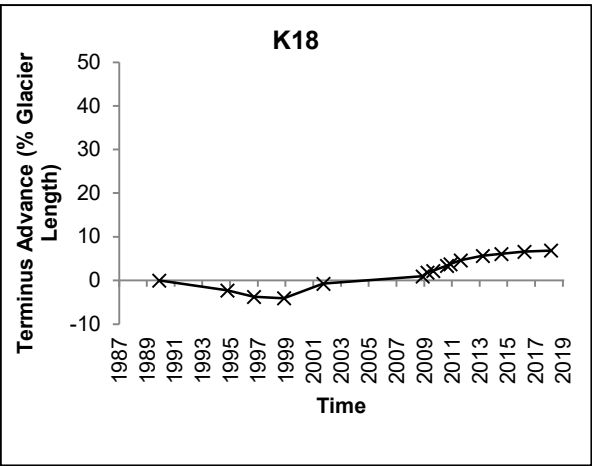

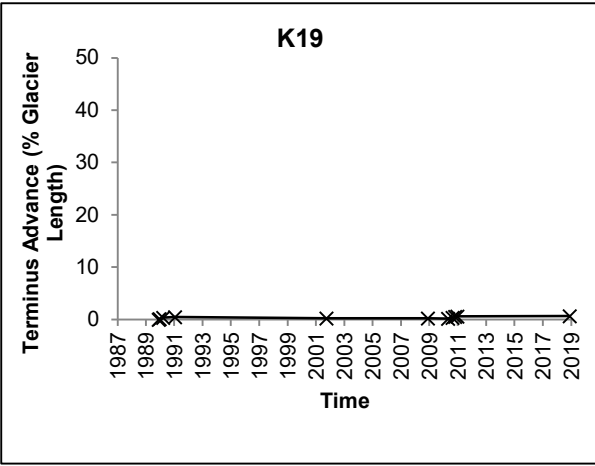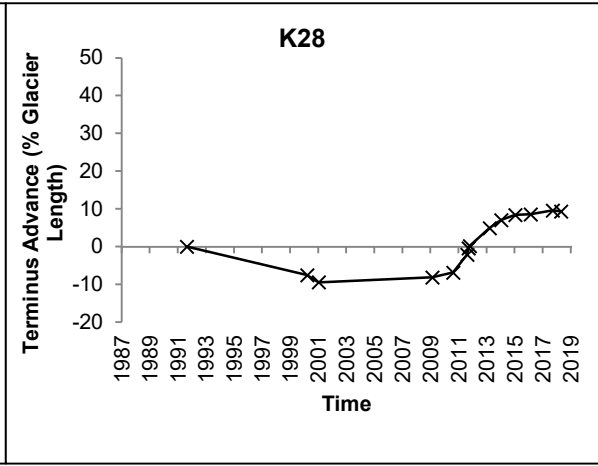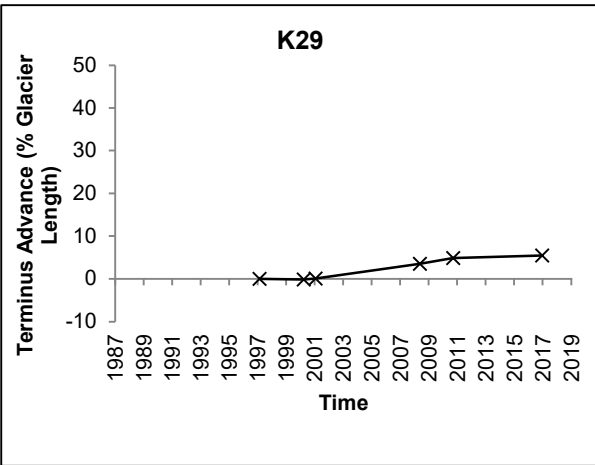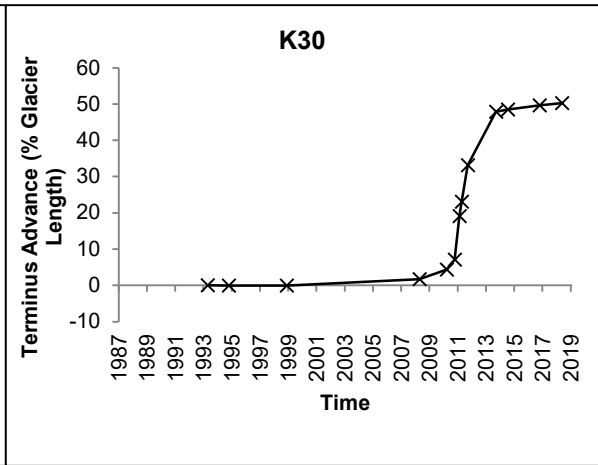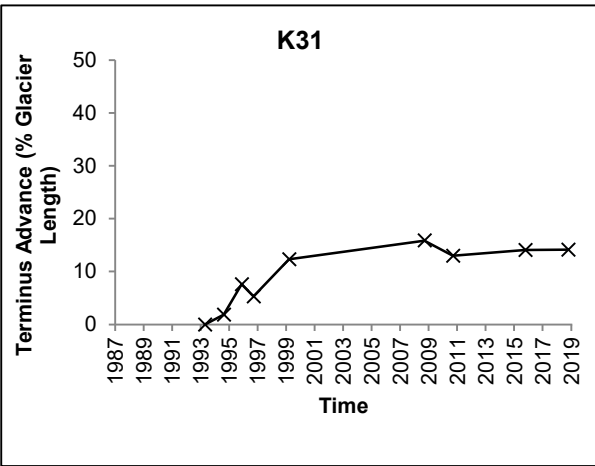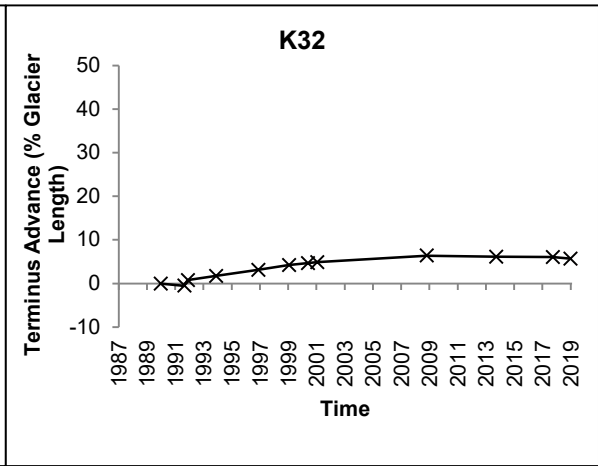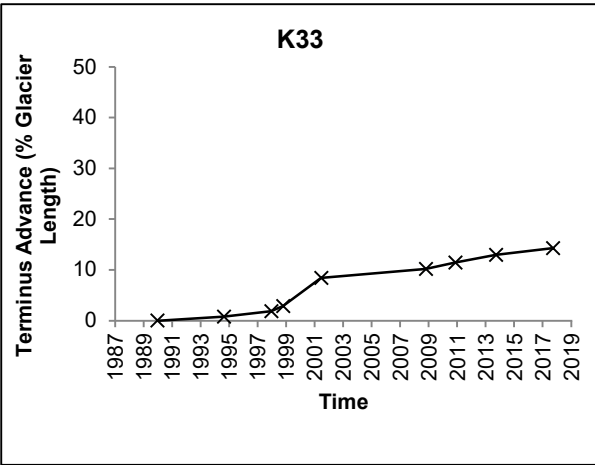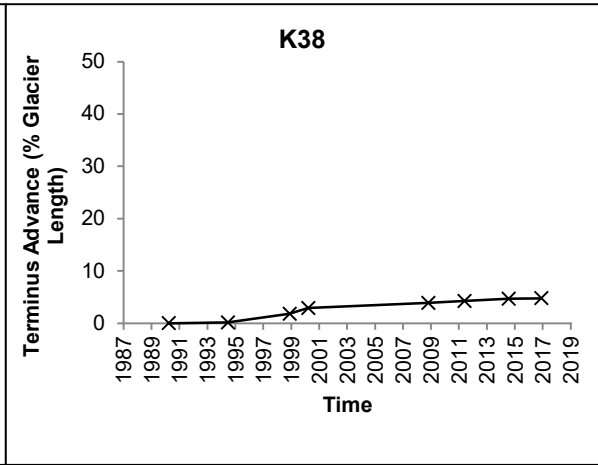

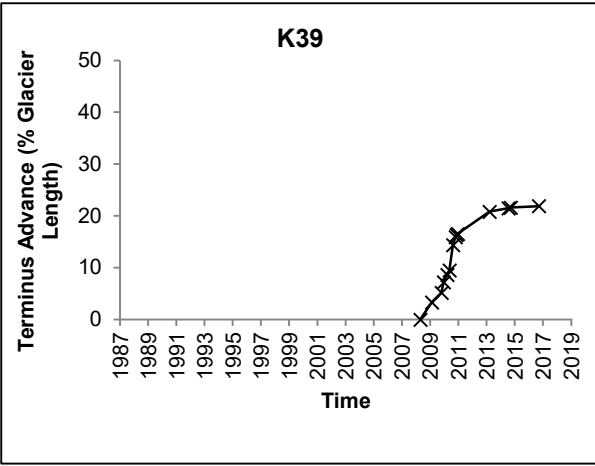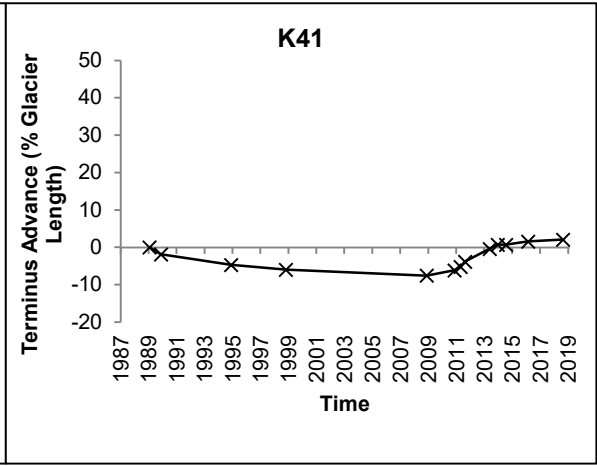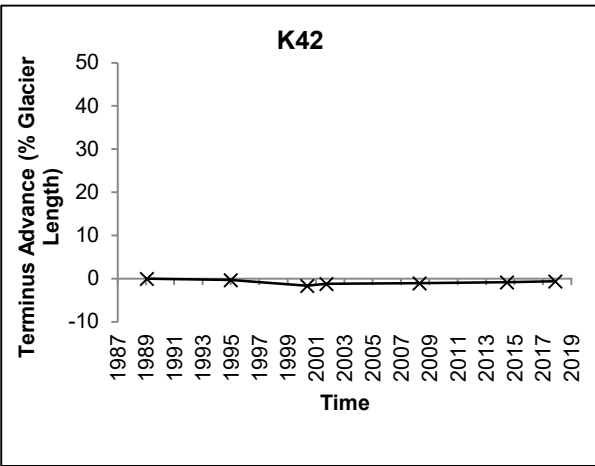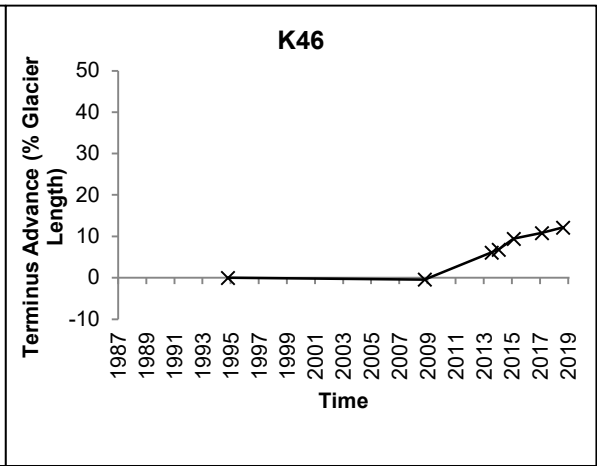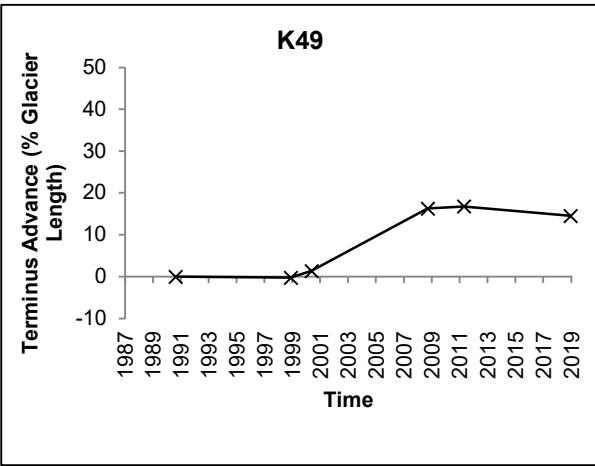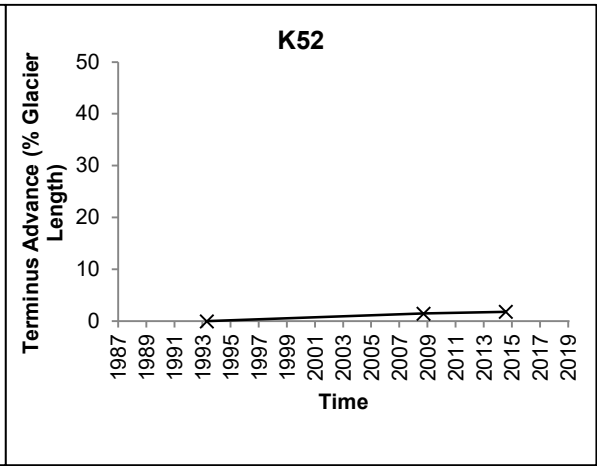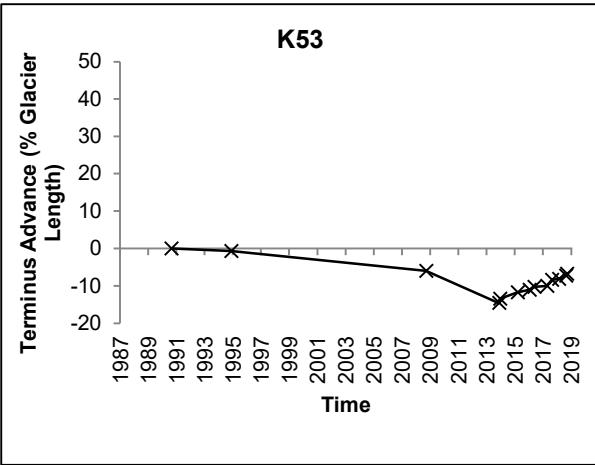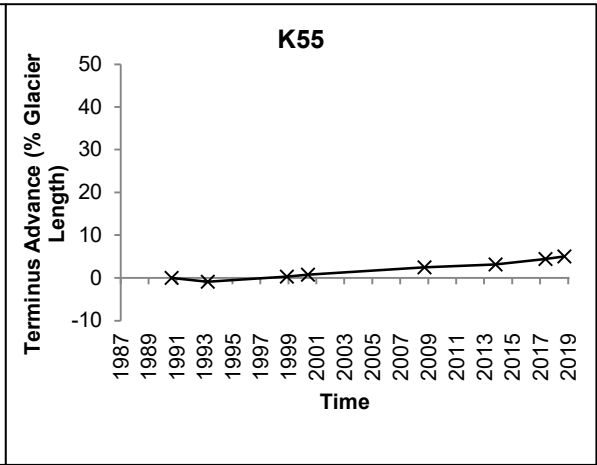

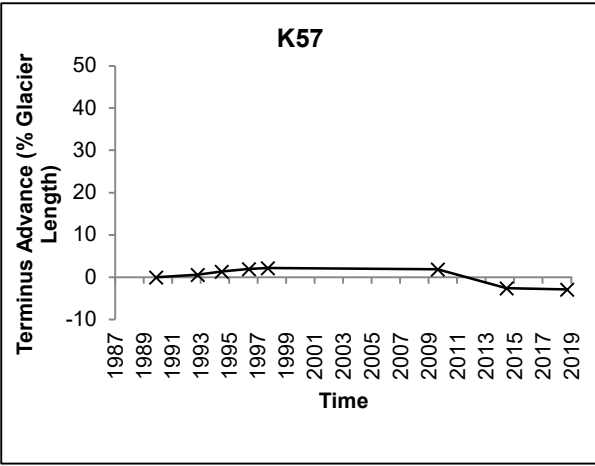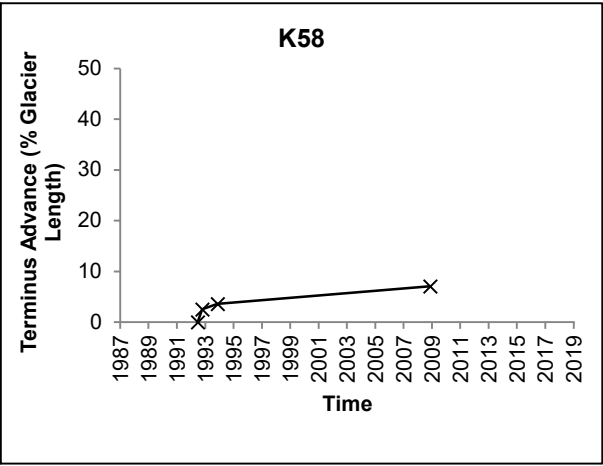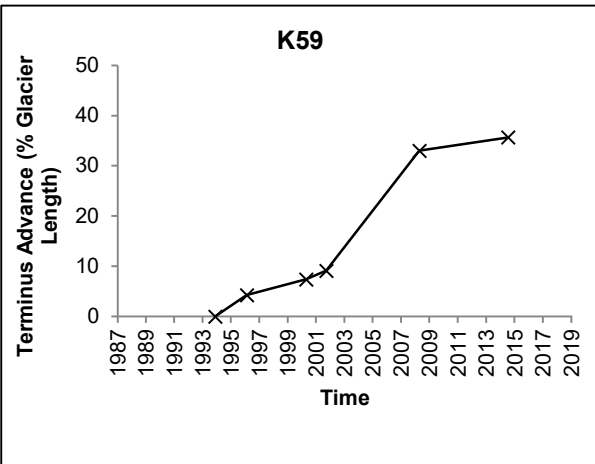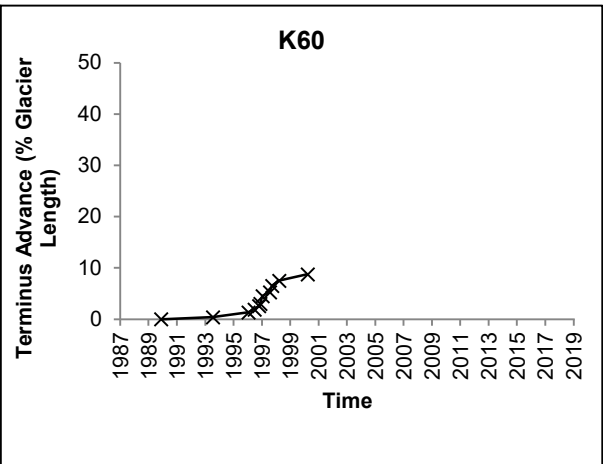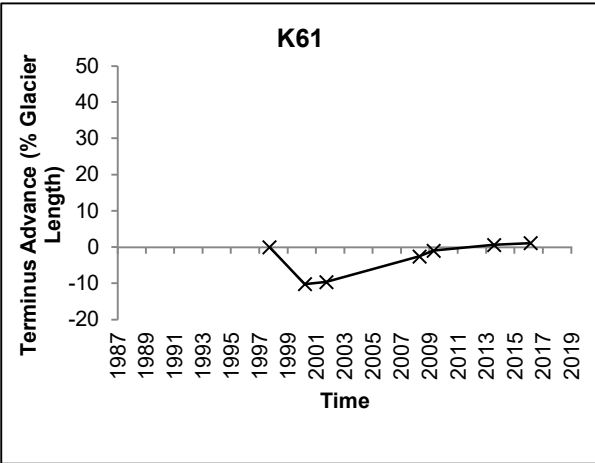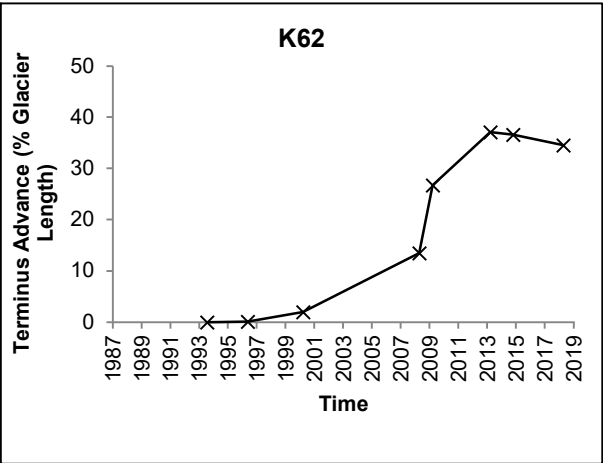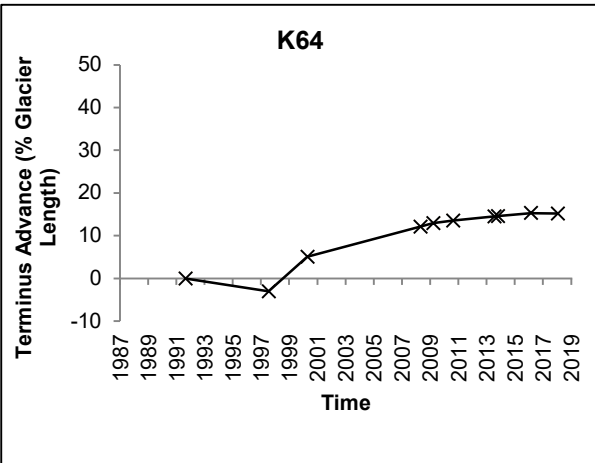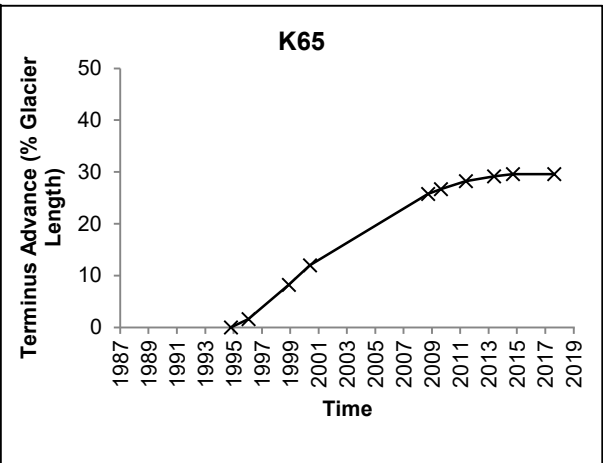



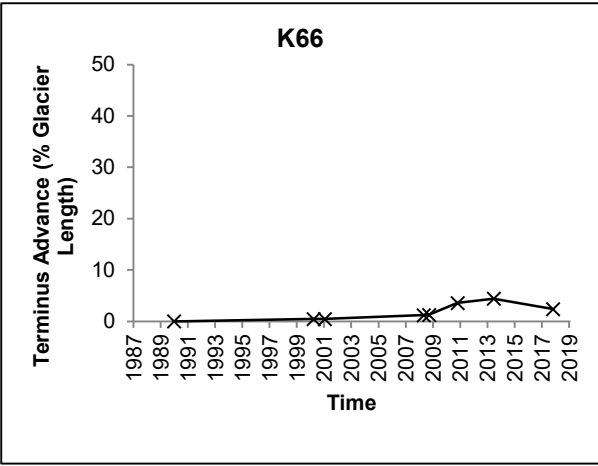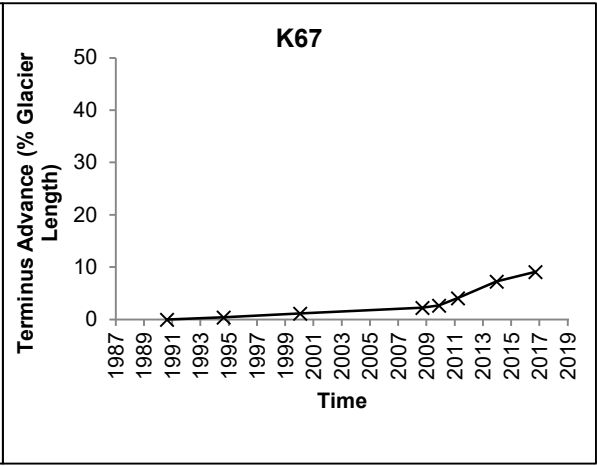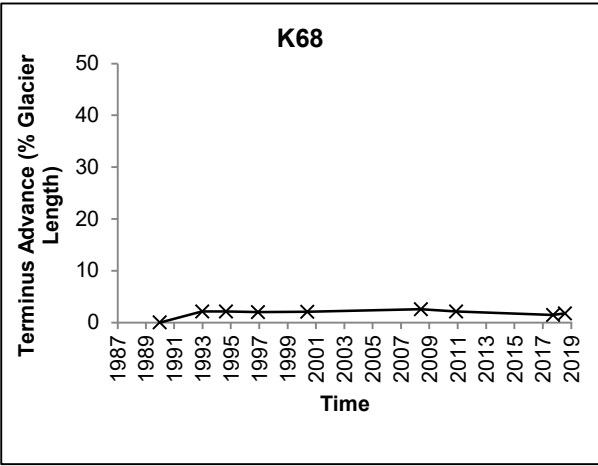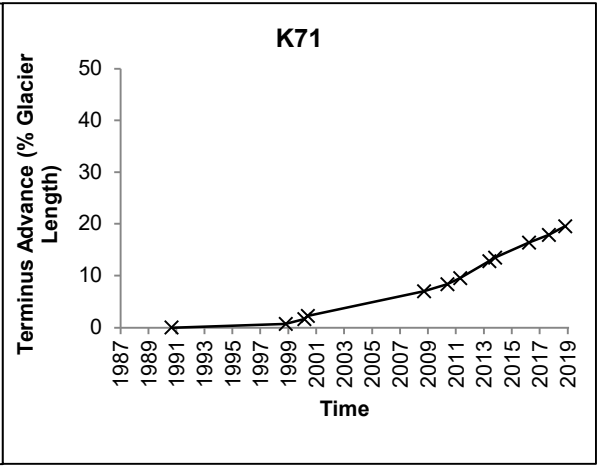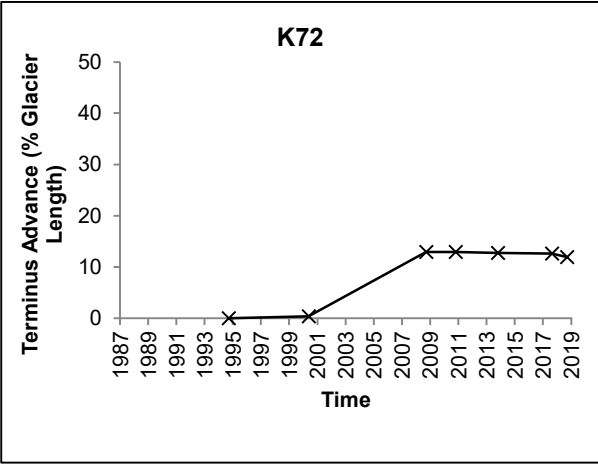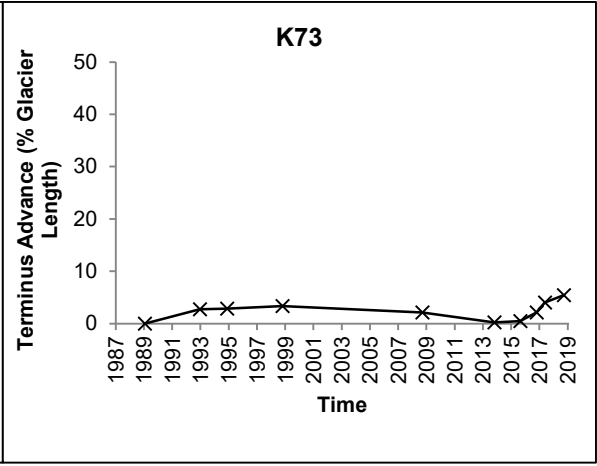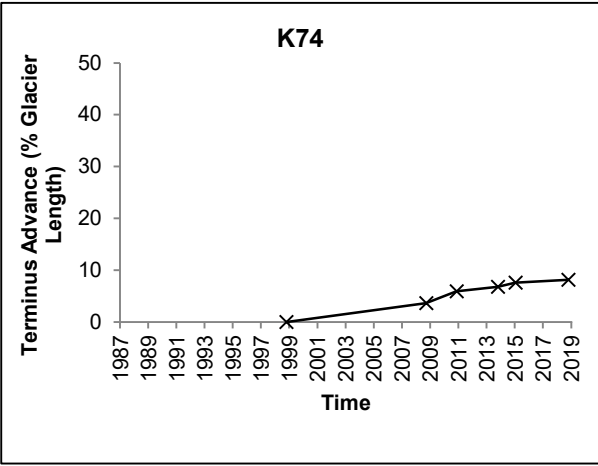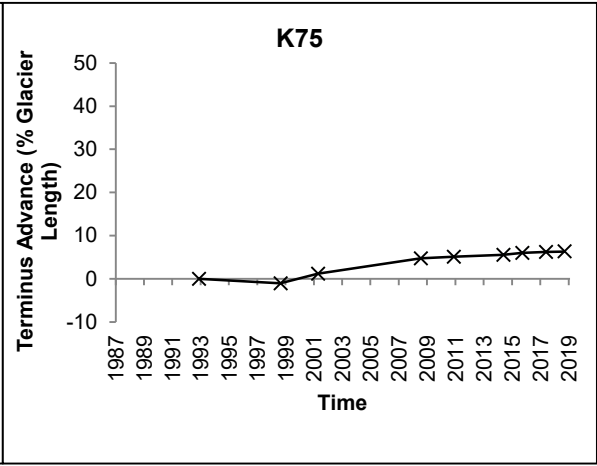

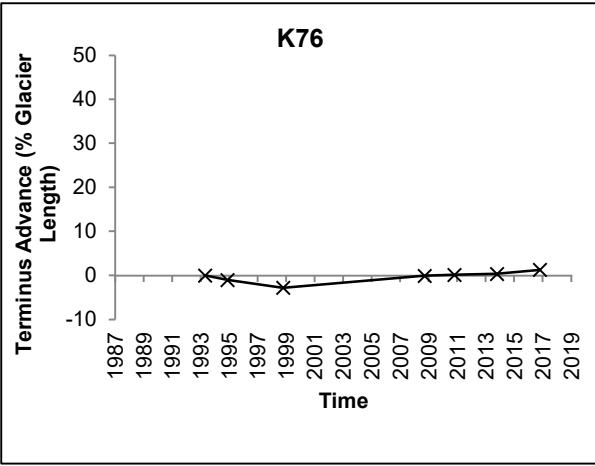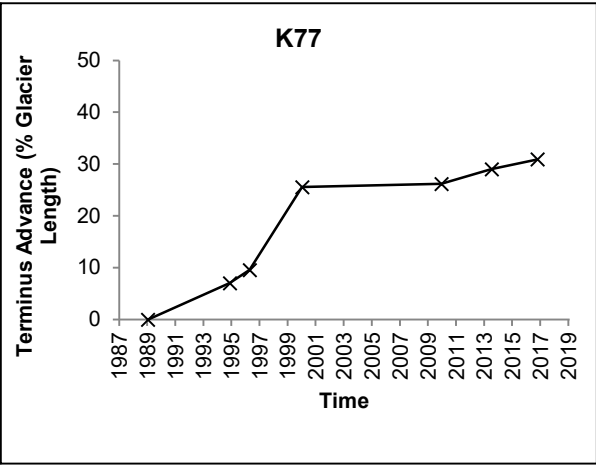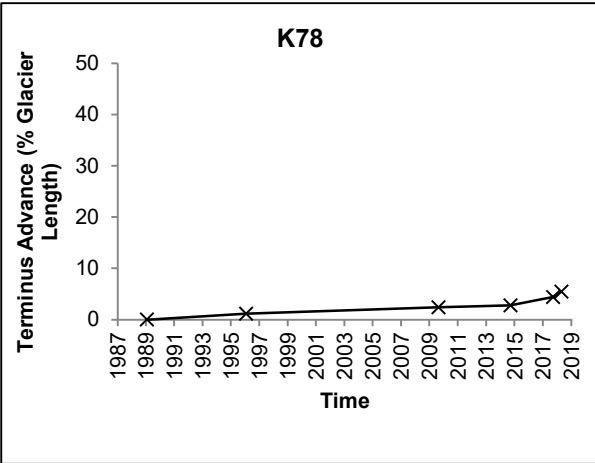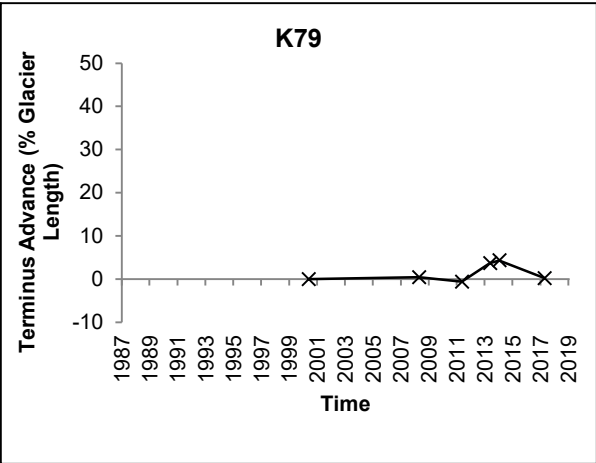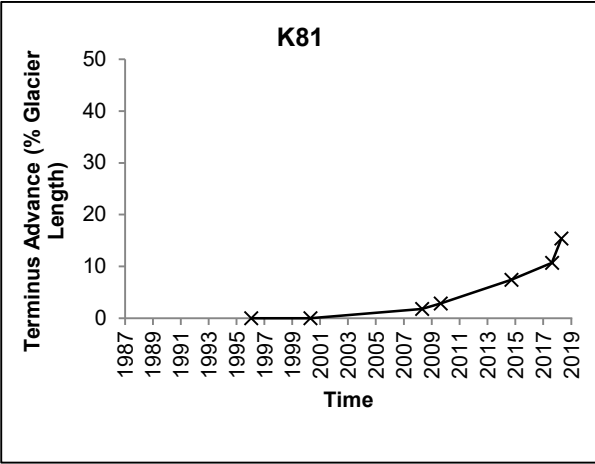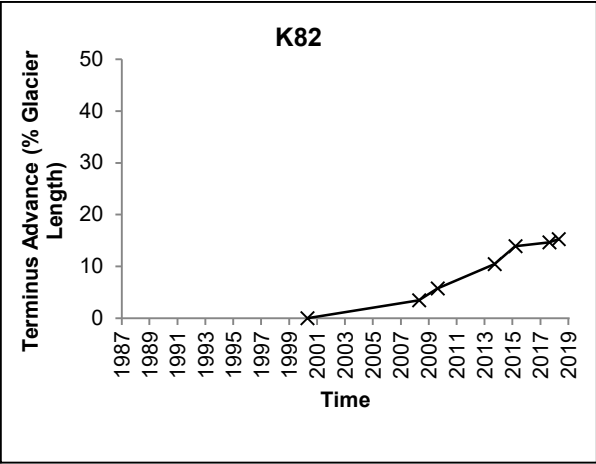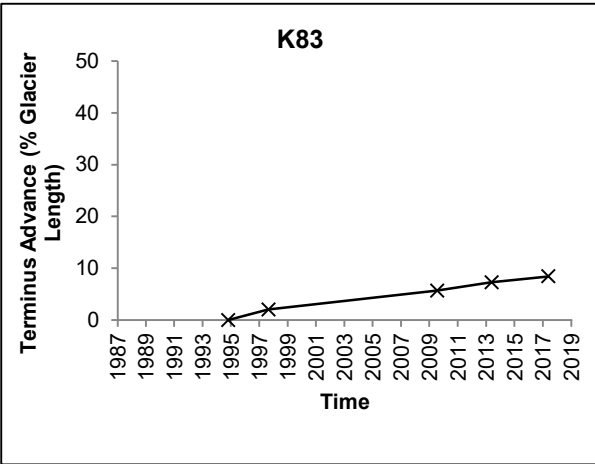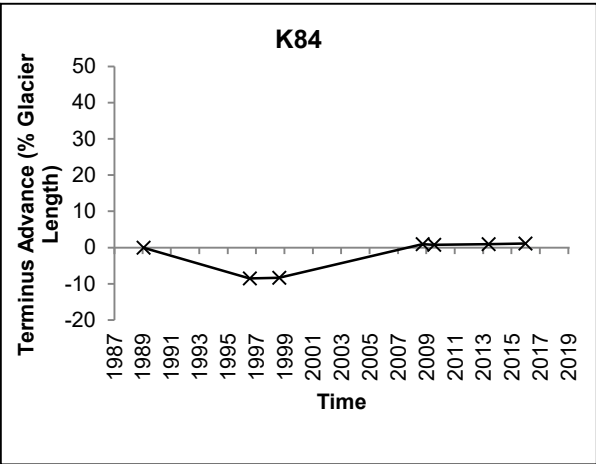

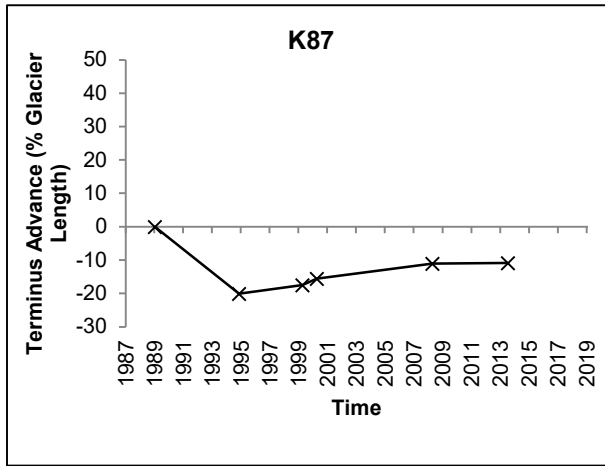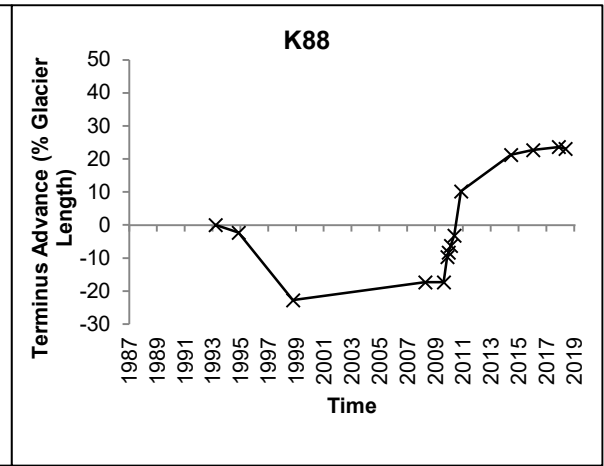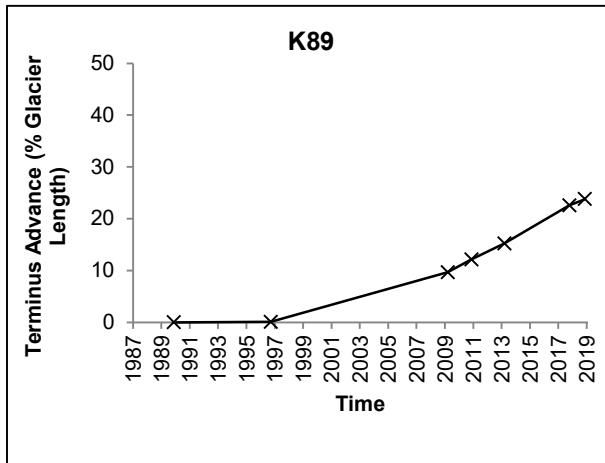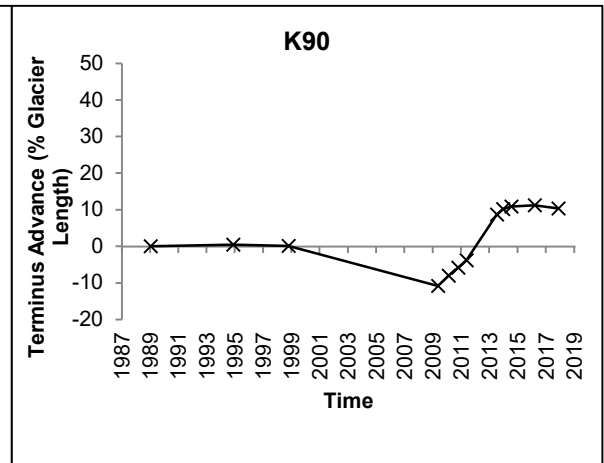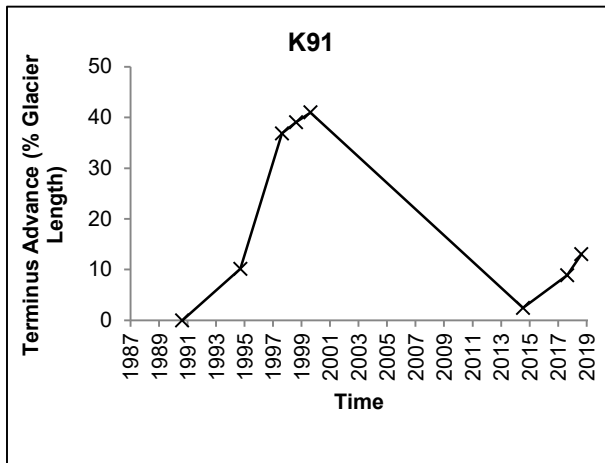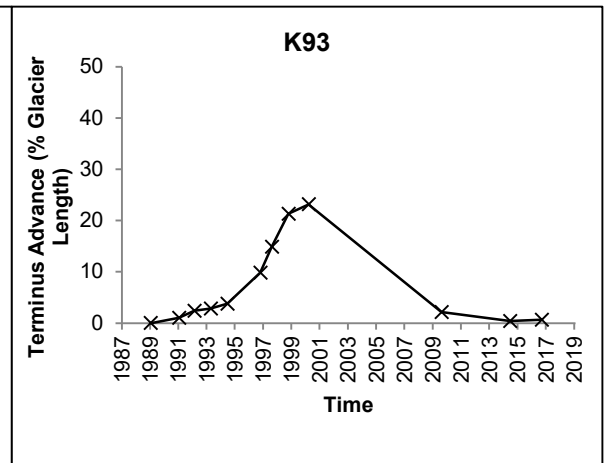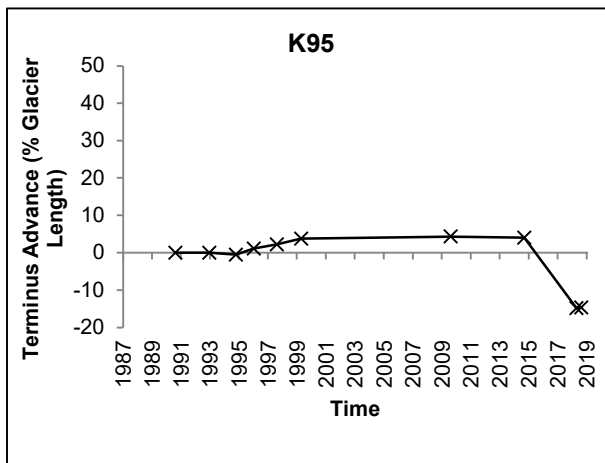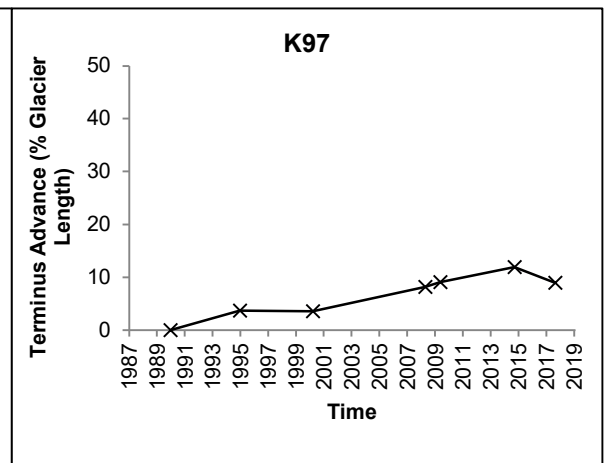

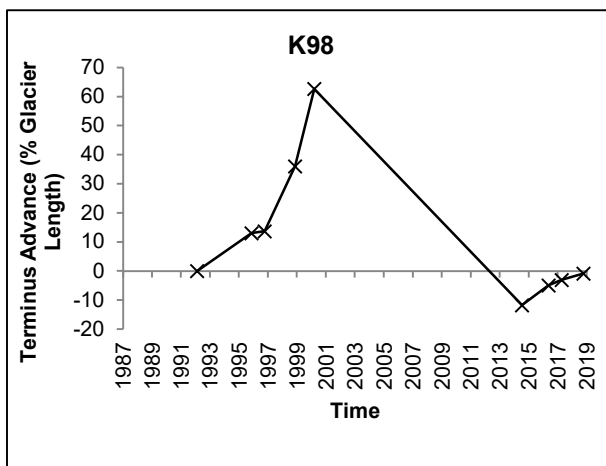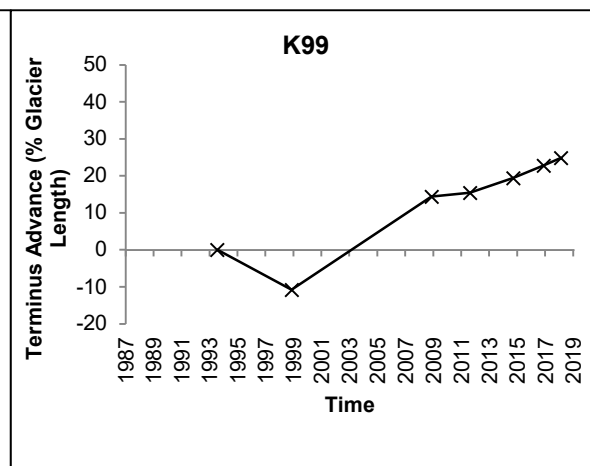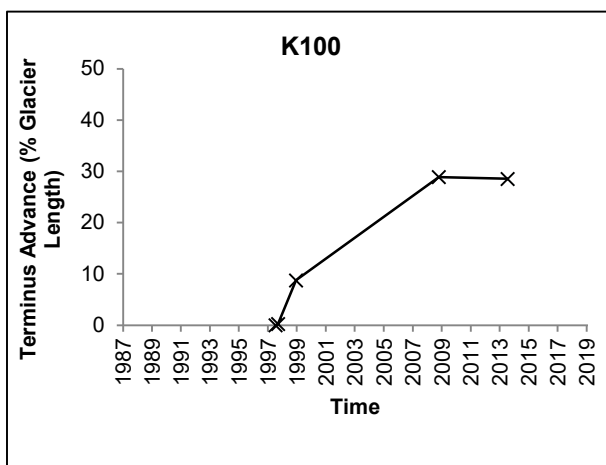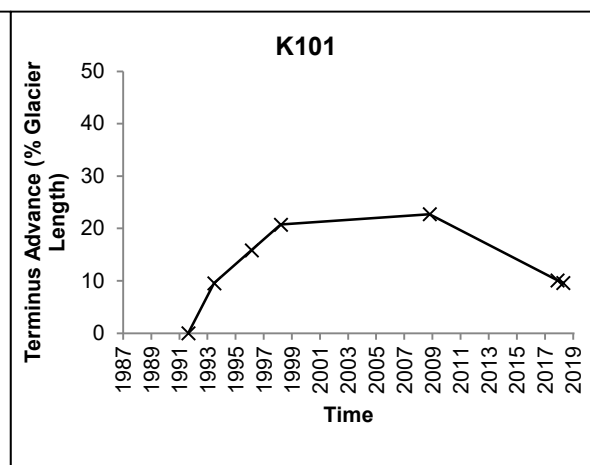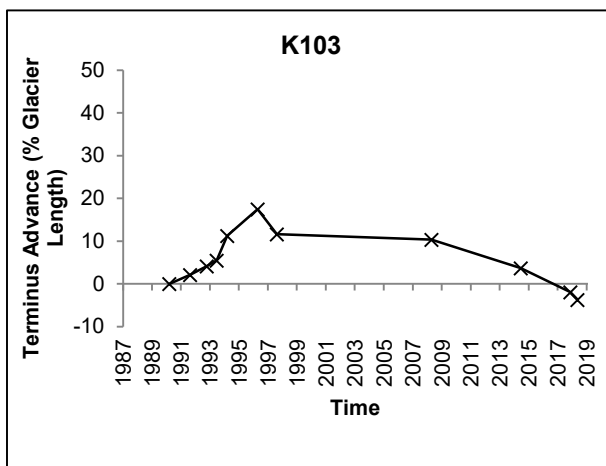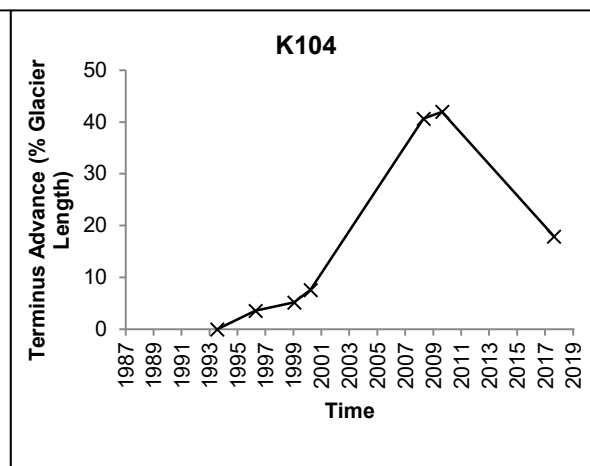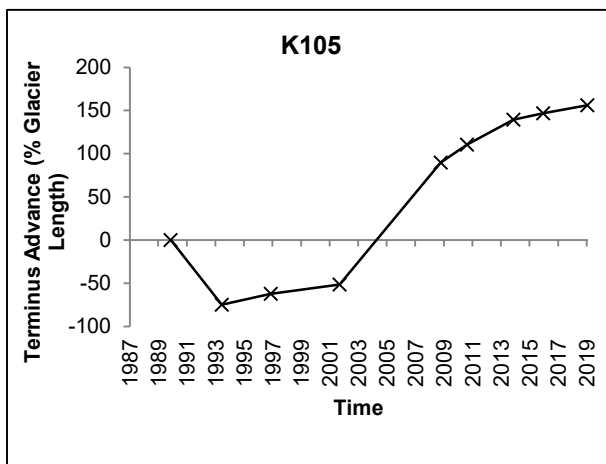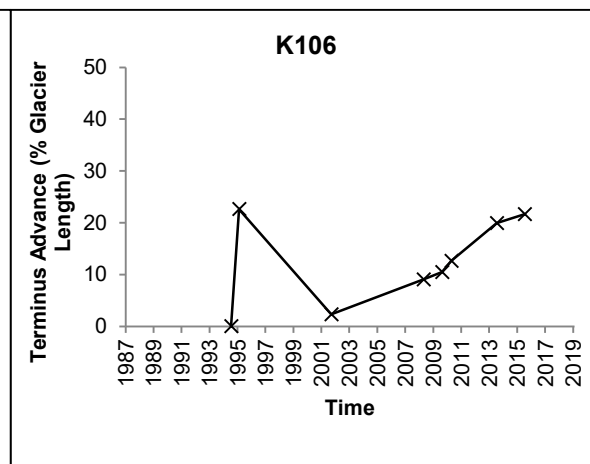

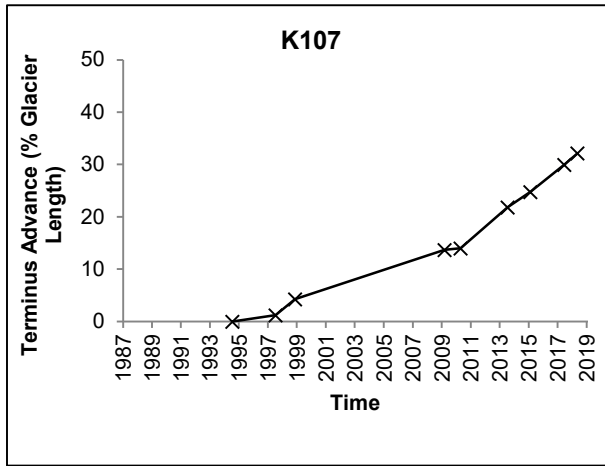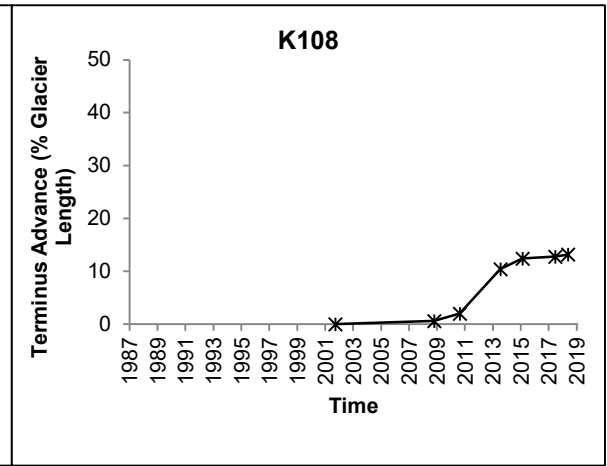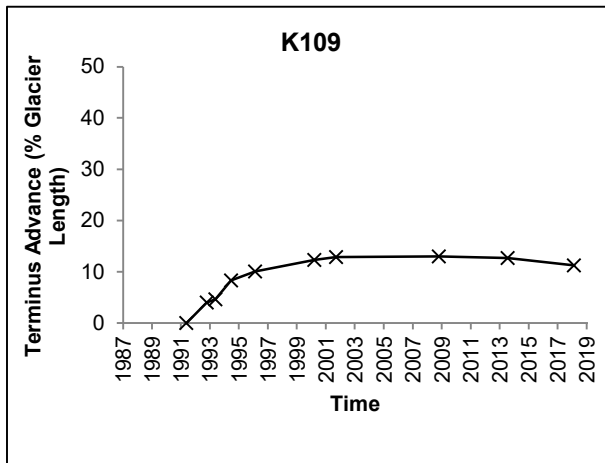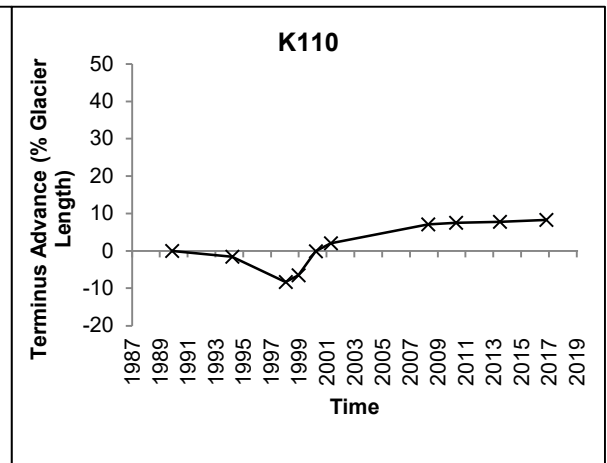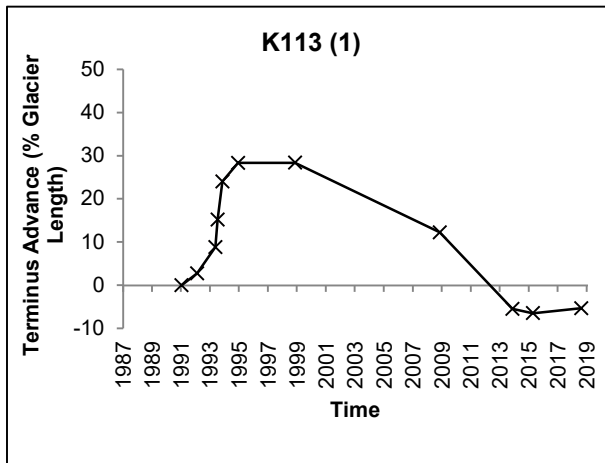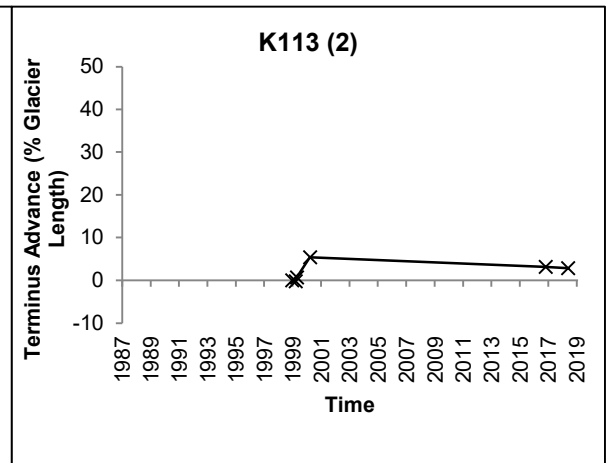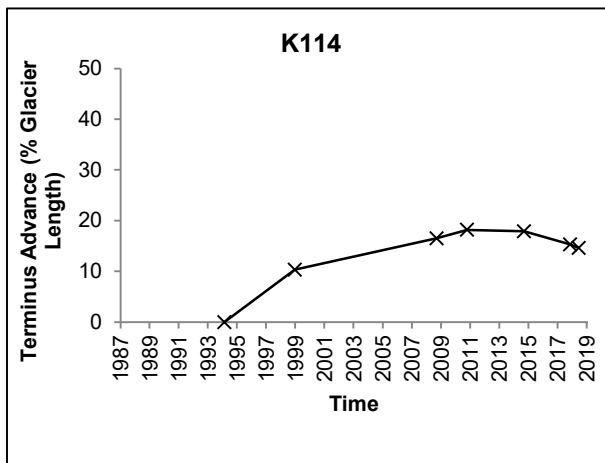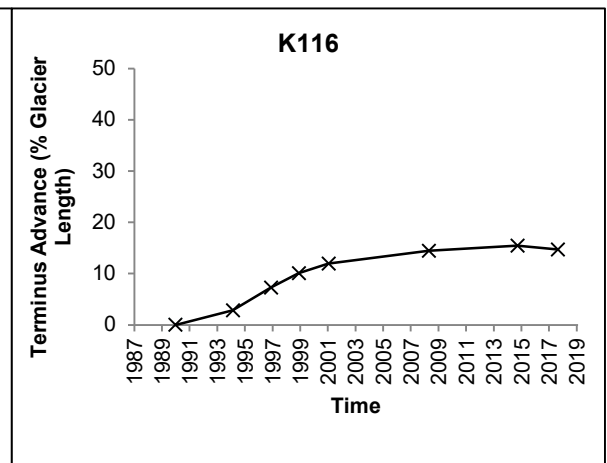

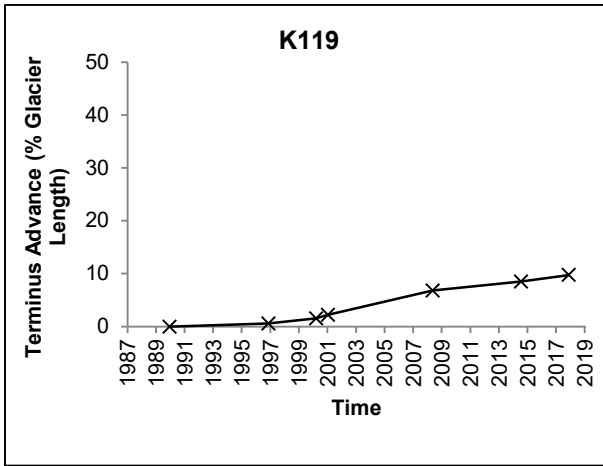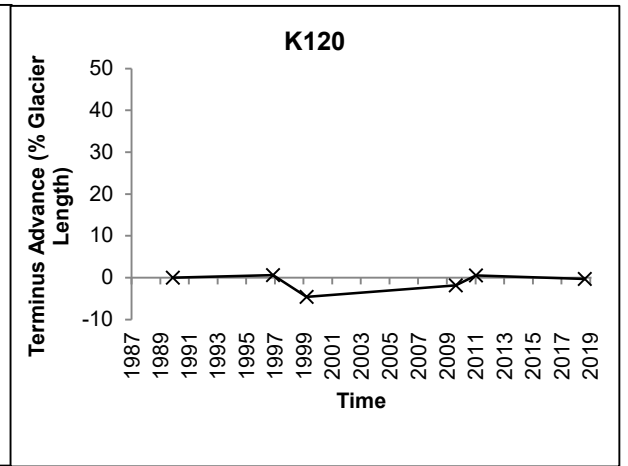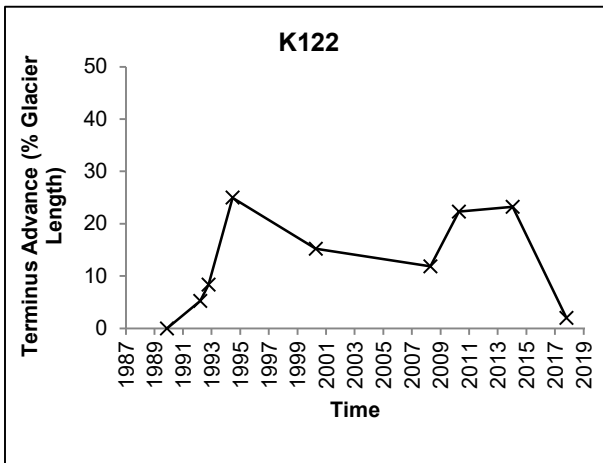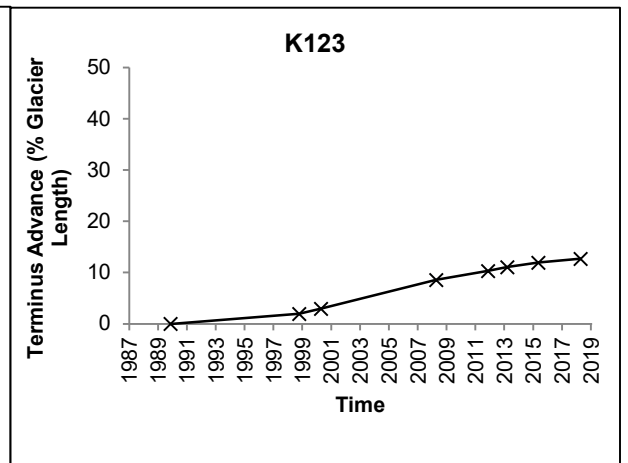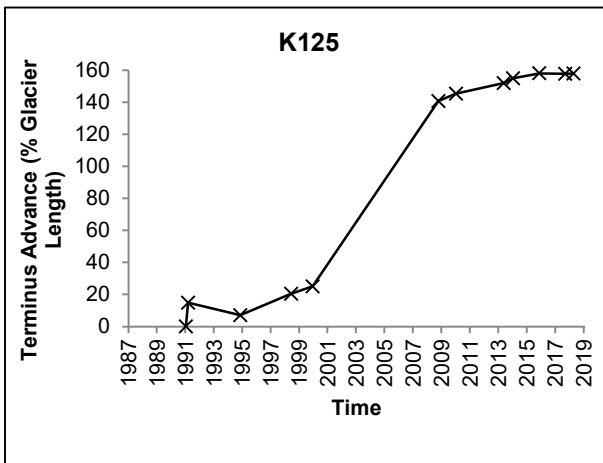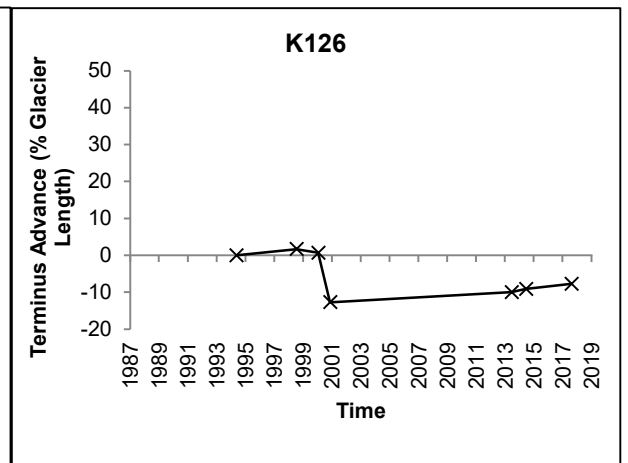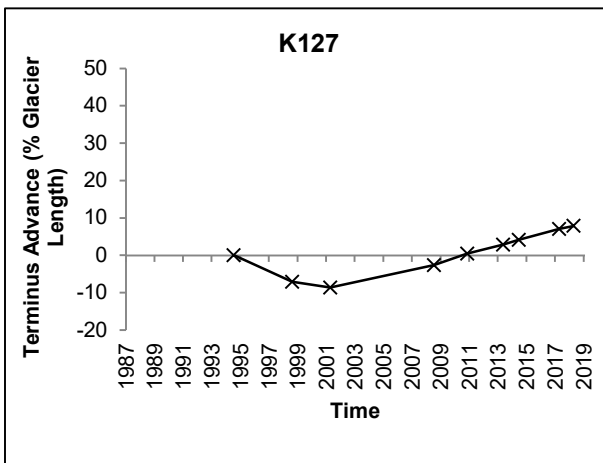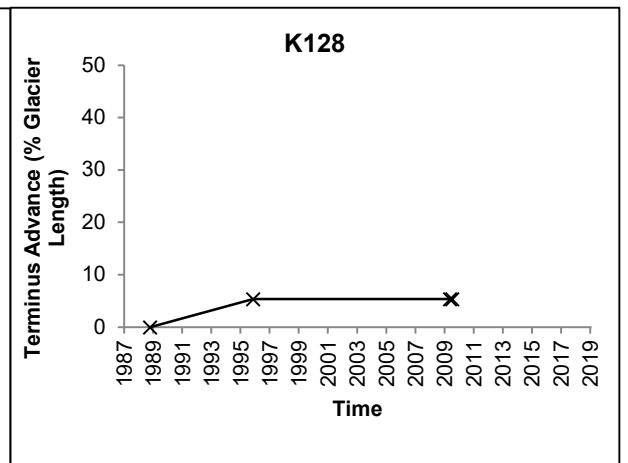

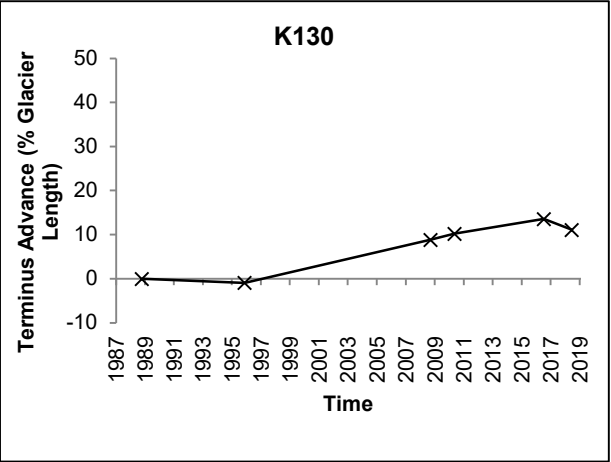

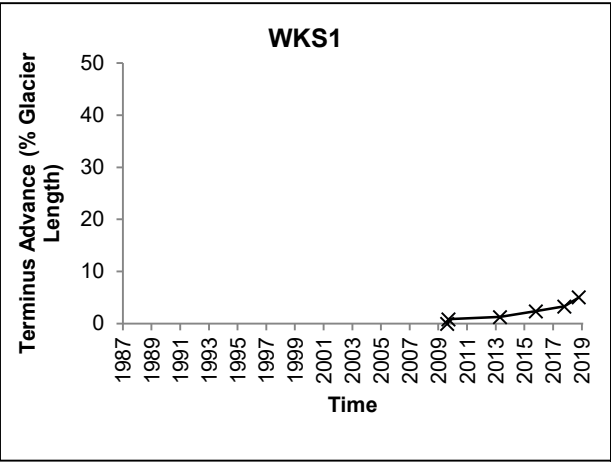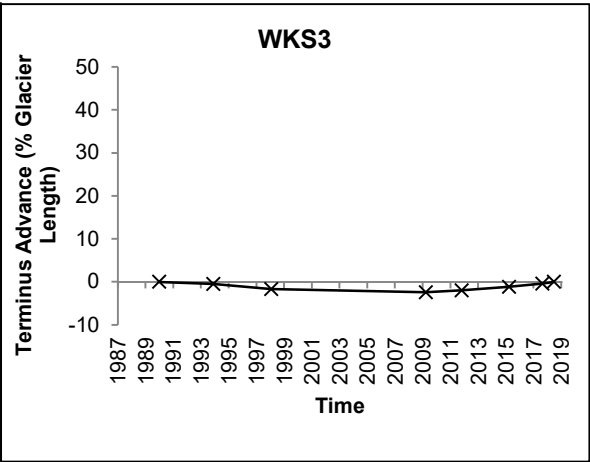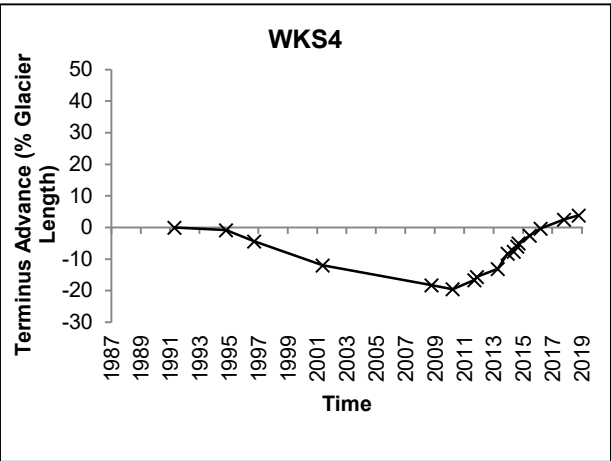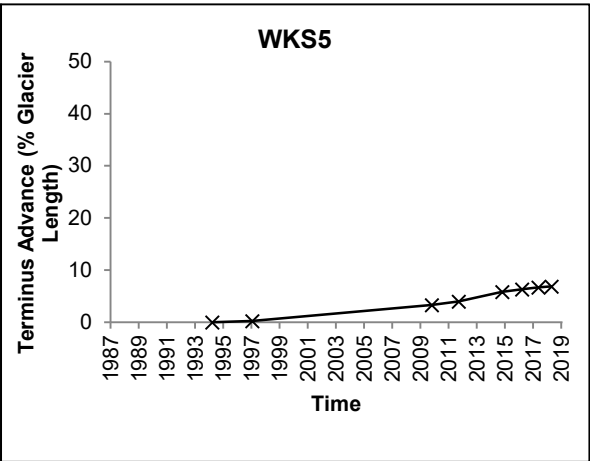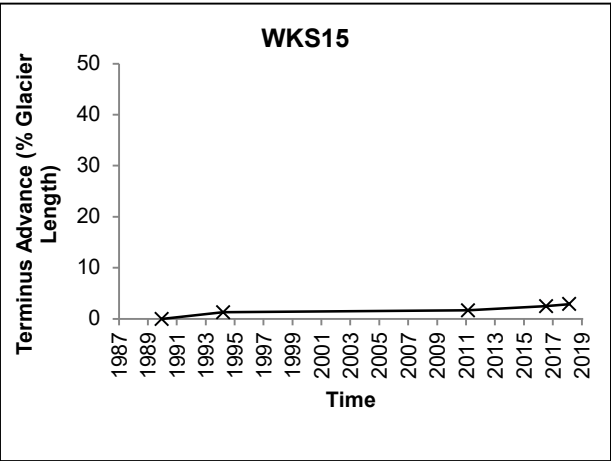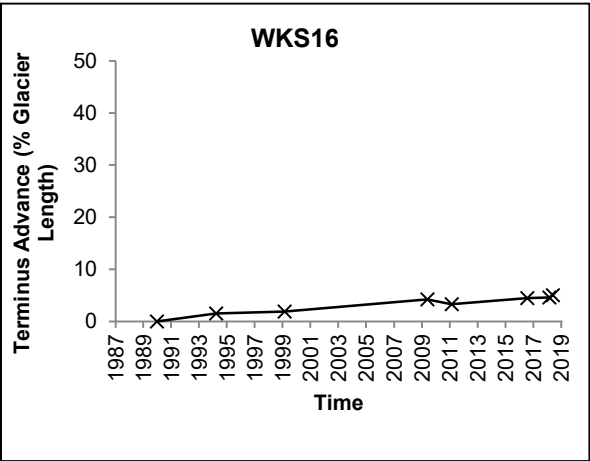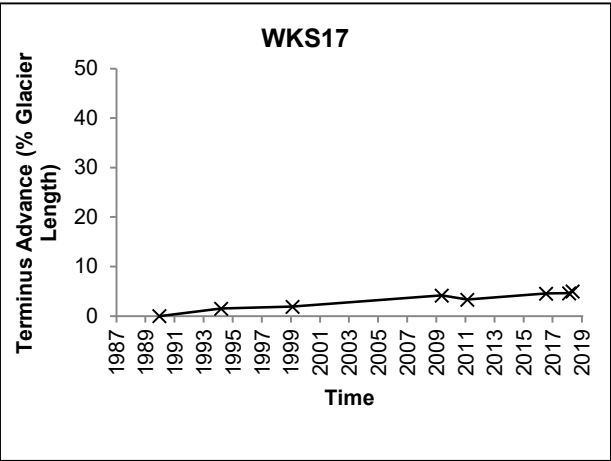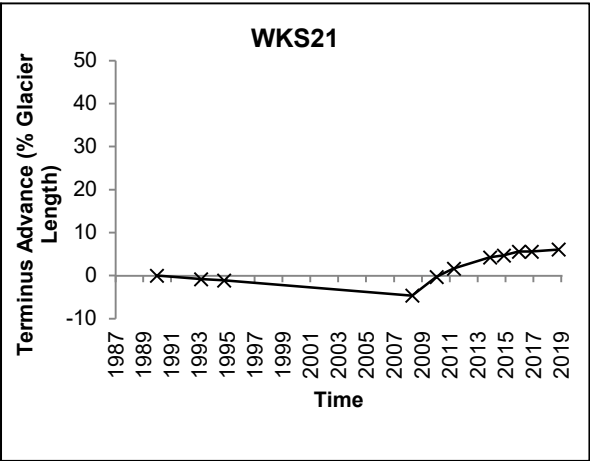



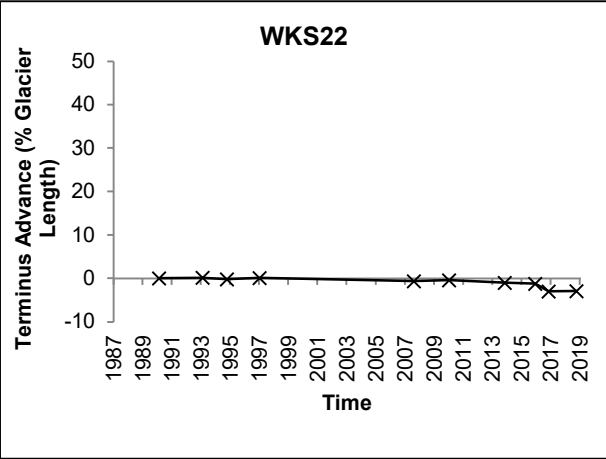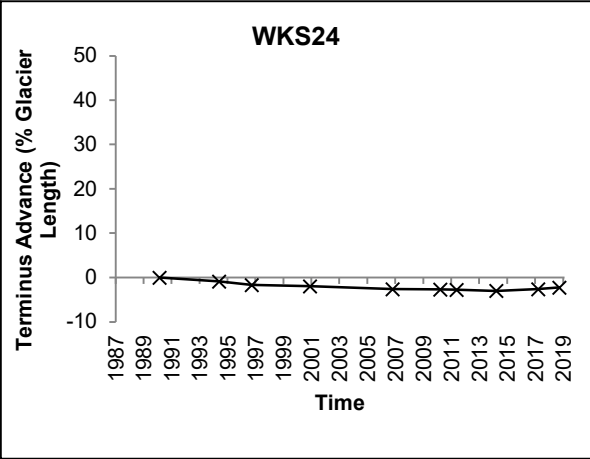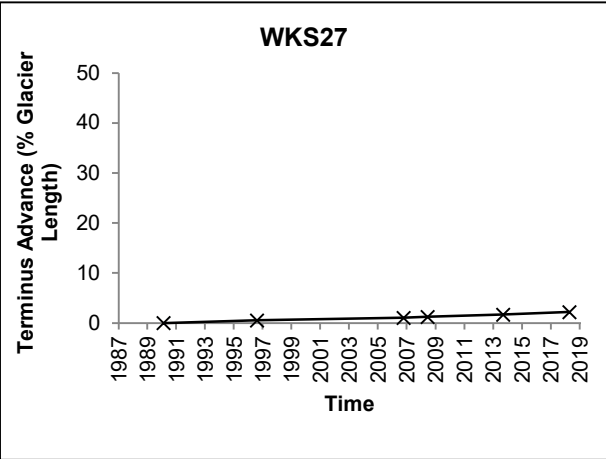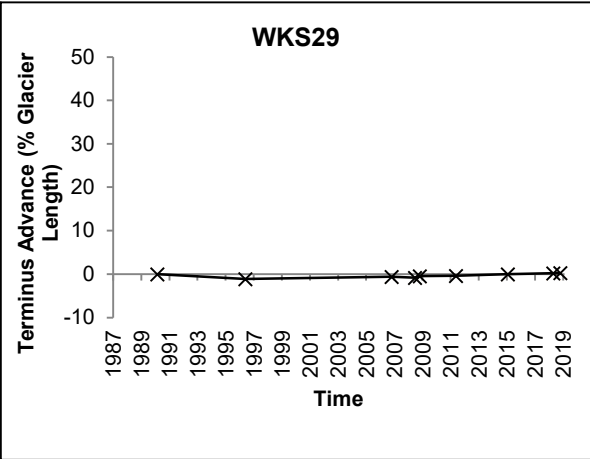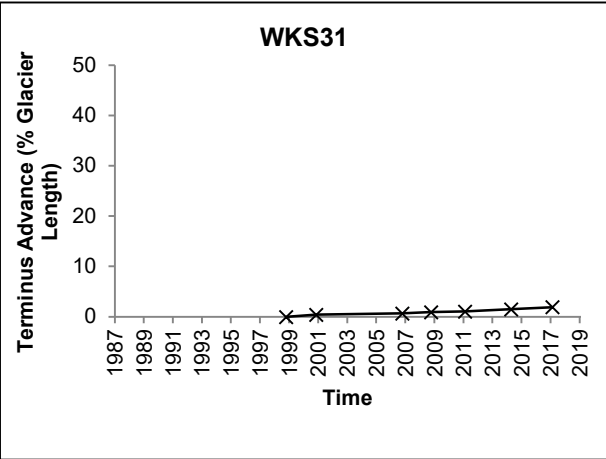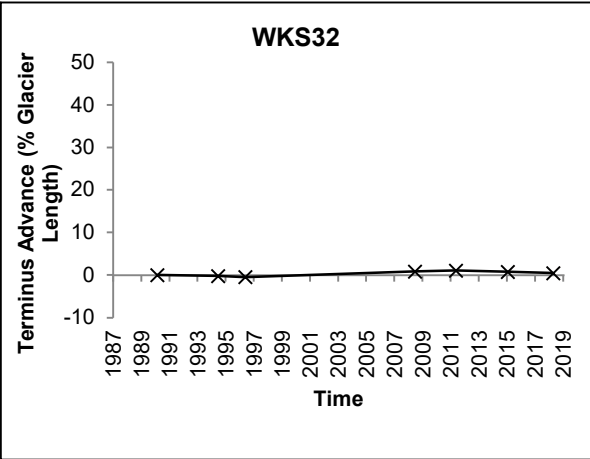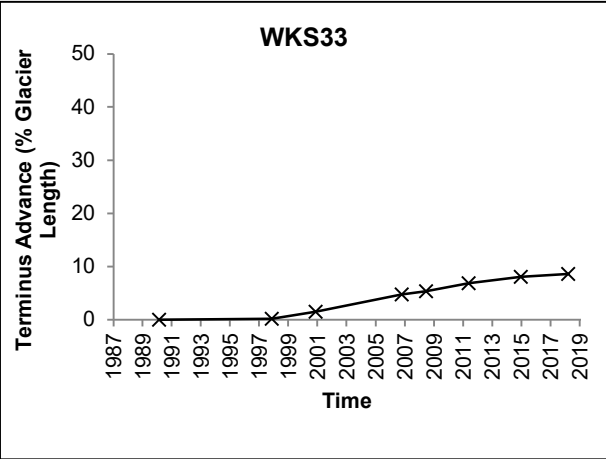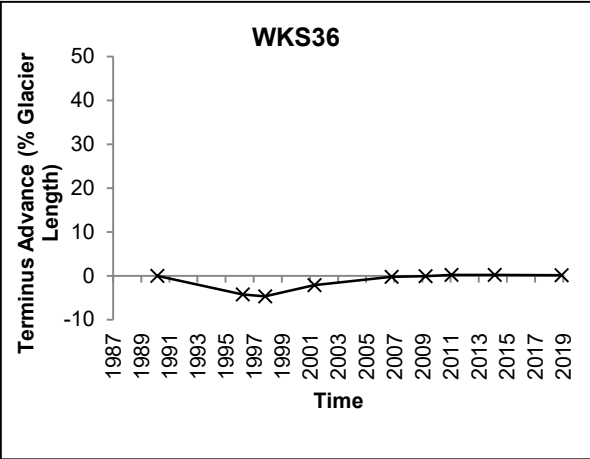

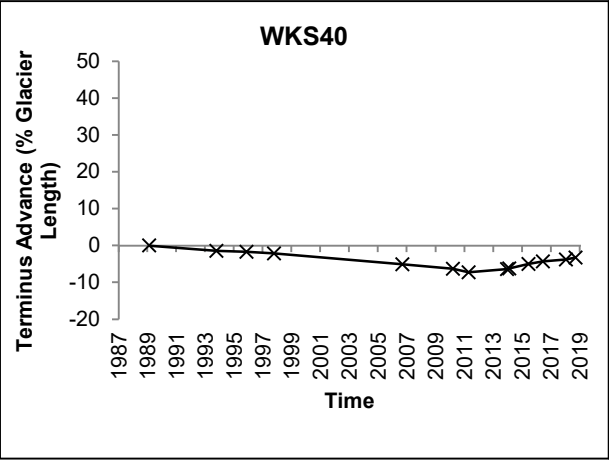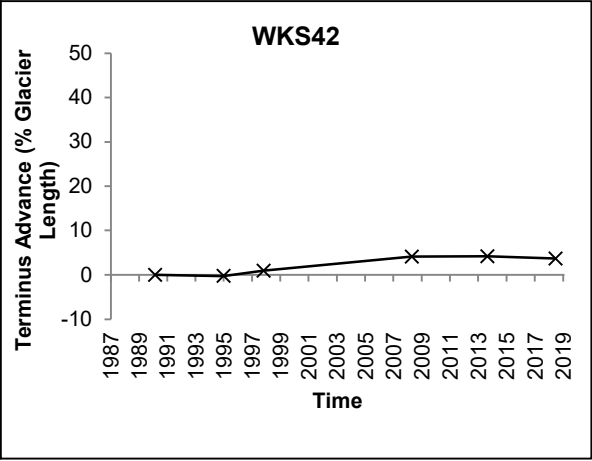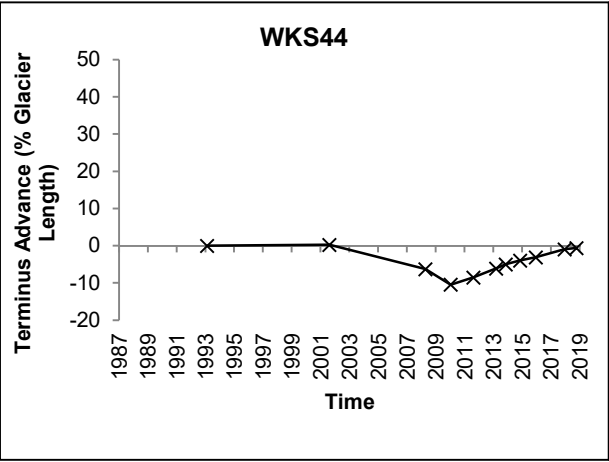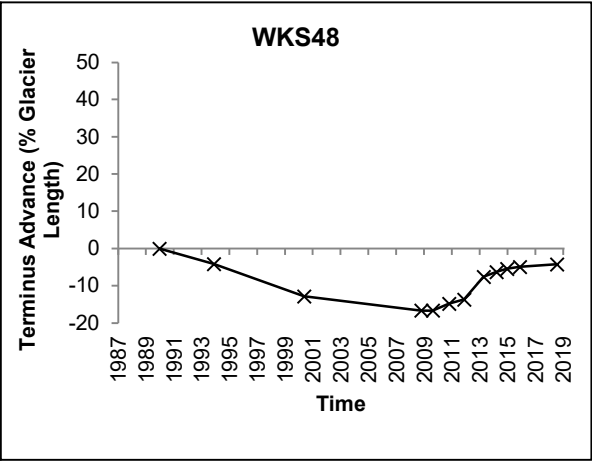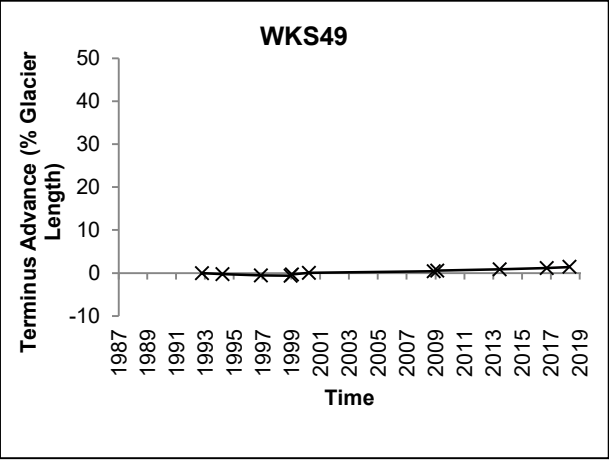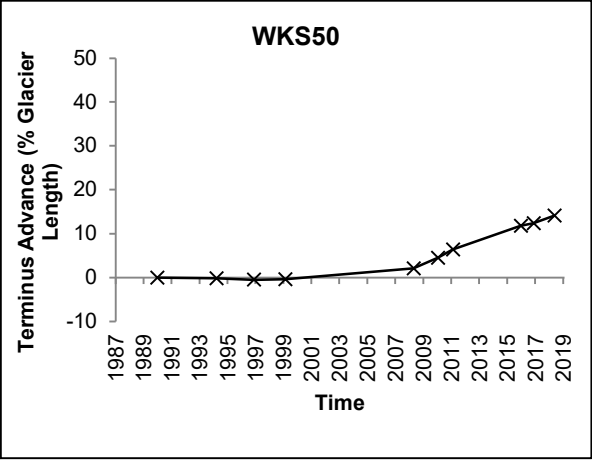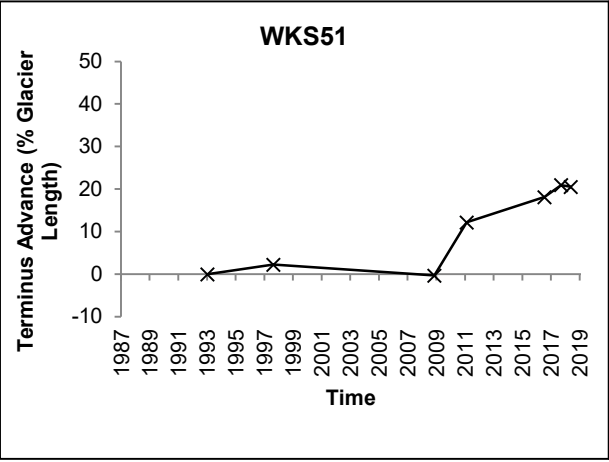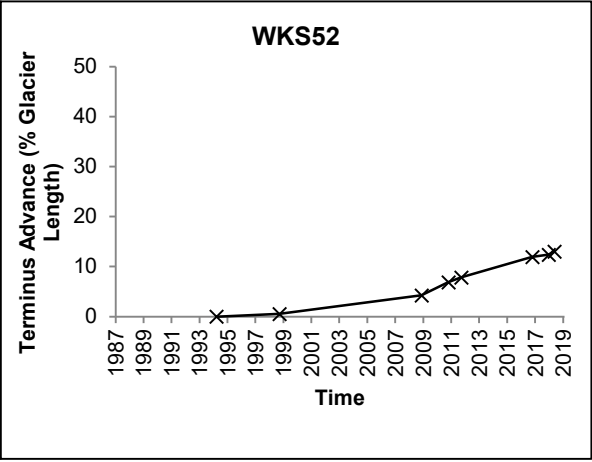

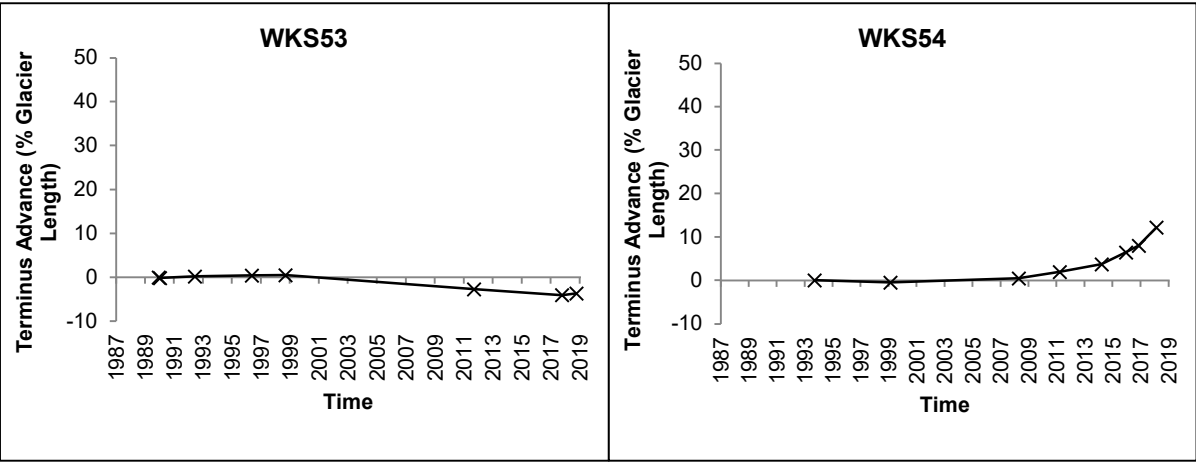

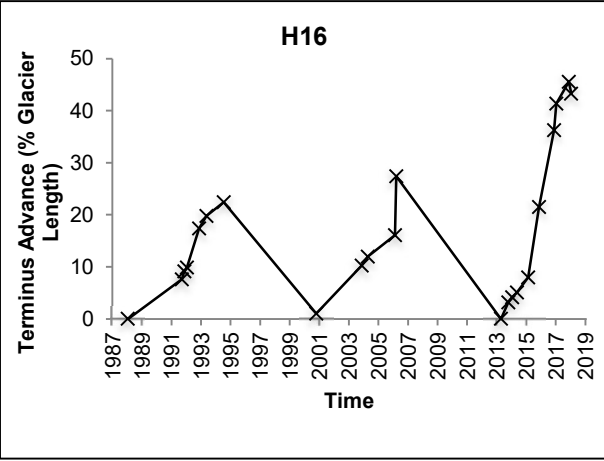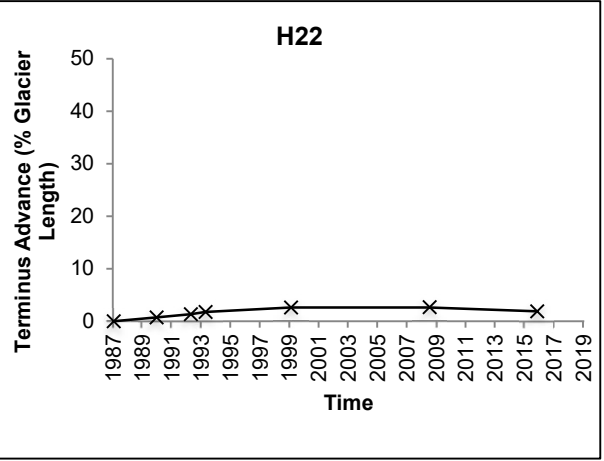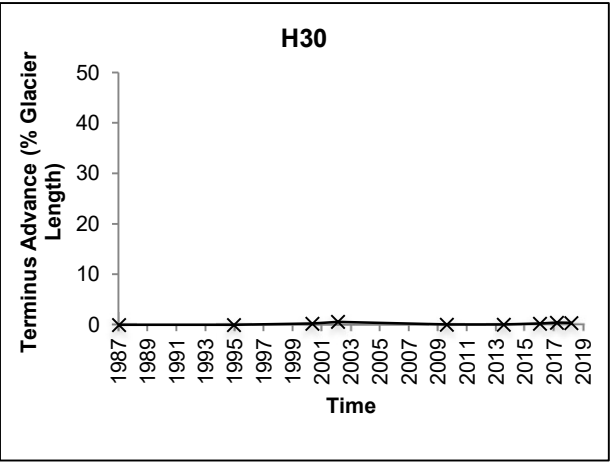

Supplement: s1 [file s1]
